# Supplementary material for: A step towards rational design of carbon nanobelts with tunable electronic properties
Source: Royal Society of Chemistry journal article supplement (doi:10.1039/d3nr04045c), 2023-01-01
Supplement: d3nr04045c1.pdf [file d3nr04045c1.pdf]

## Supporting information for:

### **A step towards rational design of carbon nanobelts with tunable electronic properties**

G. George,<sup>a</sup> O. A. Stasyuk,<sup>\*a</sup> M. Solà,<sup>\*a</sup> and A. J. Stasyuk,<sup>\*a</sup>

a. Institut de Química Computacional i Catàlisi and Departament de Química, Universitat de Girona, C/ Maria Aurèlia Capmany 69, 17003 Girona, Spain

#### **Abstract**

Belt-shaped aromatic compounds are one of the most attractive classes of radial  $\pi$ -conjugated nanocarbon molecules with unique physical and chemical properties. In this work, we computationally studied a number of all-carbon and heteroatom-bridged nanobelts, as well as their inclusion complexes with fullerene. Our results provide a useful guide to modulating electronic properties of the nanobelts. In-depth analysis of ground and excited state properties of their complexes has allowed us to establish structure-property relationships and propose simple principles for the design of nanobelts with improved electron-donating properties suitable for photovoltaic applications.

## Table of Contents

|     |                                                                                                                                                                                                                                                                          |            |
|-----|--------------------------------------------------------------------------------------------------------------------------------------------------------------------------------------------------------------------------------------------------------------------------|------------|
| 1.  | Computational methodology                                                                                                                                                                                                                                                | p. S3-S7   |
| 2.  | <b>Figure S1.</b> QTAIM molecular graphs for <b>[10]CPP<math>\supset</math>C<sub>60</sub></b> , <b>[10]MCP<math>\supset</math>C<sub>60</sub></b> , and <b>[10]ECP<math>\supset</math>C<sub>60</sub></b> complexes.                                                       | p. S8      |
| 3.  | <b>Figure S2.</b> Plot of RDG vs. $\text{sign}(\lambda_2) \times \rho$ for <b>[10]CPP<math>\supset</math>C<sub>60</sub></b> , <b>[10]MCP<math>\supset</math>C<sub>60</sub></b> , and <b>[10]ECP<math>\supset</math>C<sub>60</sub></b> complexes.                         | p. S9      |
| 4.  | <b>Figure S3.</b> NCI isosurfaces of van der Waals interactions in <b>[10]CPP<math>\supset</math>C<sub>60</sub></b> , <b>[10]MCP<math>\supset</math>C<sub>60</sub></b> , and <b>[10]ECP<math>\supset</math>C<sub>60</sub></b> complexes.                                 | p. S9      |
| 5.  | <b>Figure S4-S9.</b> Frontier molecular orbitals of the studied complexes                                                                                                                                                                                                | p. S10-S12 |
| 6.  | <b>Figure S10.</b> Calculated MEP surfaces for the studied complexes                                                                                                                                                                                                     | p. S13     |
| 7.  | <b>Table S1.</b> Charge separation between the fragments in electronic ground state for <b>[10]CPP<math>\supset</math>C<sub>60</sub></b> , <b>[10]MCP<math>\supset</math>C<sub>60</sub></b> , and <b>[10]ECP<math>\supset</math>C<sub>60</sub></b> complexes.            | p. S14     |
| 8.  | <b>Table S2.</b> Interaction energy for <b>[10]CPP<math>\supset</math>C<sub>60</sub></b> , <b>[10]ECP<math>\supset</math>C<sub>60</sub></b> , and <b>[10]MCP<math>\supset</math>C<sub>60</sub></b> , complexes computed using B3LYP functional and different basis sets. | p. S14     |
| 9.  | <b>Table S3.</b> QTAIM parameters of selected BCPs related to non-covalent interactions in <b>[10]CPP<math>\supset</math>C<sub>60</sub></b> , <b>[10]MCP<math>\supset</math>C<sub>60</sub></b> , and <b>[10]ECP<math>\supset</math>C<sub>60</sub></b> complexes.         | p. S14-S16 |
| 10. | <b>Table S4.</b> EDA results for <b>[10]MCP<math>\supset</math>C<sub>60</sub></b> , <b>[10]NCP<math>\supset</math>C<sub>60</sub></b> , <b>[10]OCP<math>\supset</math>C<sub>60</sub></b> , and <b>[10]SCPP<math>\supset</math>C<sub>60</sub></b> complexes.               | p. S16     |
| 11. | <b>Table S5.</b> Relative energies and solvation energies calculated for the studied complexes in DCM.                                                                                                                                                                   | p. S16-S17 |
| 12. | <b>Table S6.</b> Computed semi-classical rates and characteristic times for ET process in <b>[10]MCP<math>\supset</math>C<sub>60</sub></b> and <b>[10]NCP<math>\supset</math>C<sub>60</sub></b> complexes using different effective Huang-Rhys factors.                  | p. S17     |
| 13. | Cartesian coordinates                                                                                                                                                                                                                                                    | p. S18-S35 |
| 14. | References                                                                                                                                                                                                                                                               | p. S36-S38 |

## Computational Methodology

### Quantum-chemical calculations

Geometry optimization of the complexes was performed employing the DFT B3LYP<sup>1-3</sup> exchange–correlation functional with Ahlrichs’ def2-SVP basis set.<sup>4,5</sup> The empirical dispersion D3 correction was computed with the Becke–Johnson damping function.<sup>6,7</sup> Vertical excitation energies were calculated using TDA formalism<sup>8</sup> with the range-separated CAM-B3LYP<sup>9</sup> functional and def2-SVP basis set,<sup>4,5</sup> as implemented in the Gaussian16 (rev. A03) program.<sup>10</sup> The same program was used for population analysis and calculation of Mulliken,<sup>11,12</sup> Lowdin,<sup>13</sup> Hirshfeld,<sup>14</sup> CM5,<sup>15</sup> NPA,<sup>16</sup> and Merz-Singh-Kollman<sup>17</sup> charges. Interaction energy was computed using the B3LYP functional coupled with def2-TZVP basis<sup>18</sup> for the B3LYP-D3(BJ)/def2-SVP optimized geometries. Its energy decomposition analysis (EDA)<sup>19,20</sup> was performed using the Amsterdam Density Functional (ADF) program.<sup>21</sup> Molecular structures and frontier molecular orbitals were visualized by Chemcraft 1.8. program.<sup>22</sup>

### TD-DFT vs TDA approximation

The Tamm-Dancoff approximation (TDA) is a popular method in computational chemistry because it is formally simpler than the full Casida formalism by setting matrix **B** to zero.

Optical spectra and exciton binding energies can be obtained from the Casida equation:

$$\begin{bmatrix} A & B \\ B^* & A^* \end{bmatrix} \begin{bmatrix} \vec{X}_I \\ \vec{Y}_I \end{bmatrix} = \omega_I \begin{bmatrix} 1 & 0 \\ 0 & -1 \end{bmatrix} \begin{bmatrix} \vec{X}_I \\ \vec{Y}_I \end{bmatrix} \quad (1)$$

where **A** and **B** are excitation and de-excitation matrices, respectively,  $X_n$  and  $Y_n$  are  $n$ th eigenvectors, and  $\omega_i$  is the  $n$ th eigenvalue.

$$A_{ia\sigma,jb\tau} = \delta_{\sigma\tau} \delta_{ij} \delta_{ab} (\epsilon_{a\sigma} - \epsilon_{i\sigma}) + (ia | f_h + f_{XC}^{\sigma\tau} | jb) \quad (2)$$

$$B_{ia\sigma,jb\tau} = (ia | f_h + f_{XC}^{\sigma\tau} | bj) \quad (3)$$

In case of TDA formalism matrix **B** setting to 0, and thus

$$A\vec{X}_I = \omega_I \vec{X}_I \quad (4)$$

which is comparable to the CIS equation with the difference that in TD-DFT the elements of the matrix **A** depend on the exchange-correlation kernel. Setting matrix **B** to zero allow to save a lot of computational resources.<sup>23</sup>

It is also worthwhile to note that for a long-range CT state in the TD-DFT the **B** matrix vanishes, which is equivalent to applying the Tamm-Dancoff approximation. Thus, TD-DFT and TD-DFT/TDA yield identical results for the excitation energies of long-range CT states.<sup>23</sup> It was also demonstrated that TDA is in a good agreement with both TD-DFT and experimental band shapes for conjugated molecules.<sup>24</sup> Isegawa and Truhlar showed that the TDA overestimates excitation energies as compared to TD-DFT, but the average absolute error changes insignificantly.<sup>25</sup> According to the systematic evaluations, the TDA performs better than the TD-DFT in calculation of nonadiabatic couplings between ground and excited states. The

correlation between TD-DFT and TDA is good when hybrid functionals are used.<sup>25</sup> Overall, the TDA is a safe way to simplify the original TD-DFT formulation.<sup>26</sup>

### Energy decomposition analysis

The interaction energy in the gas phase was examined in the framework of the Kohn-Sham MO model using a quantitative energy decomposition analysis (EDA)<sup>27-29</sup> into electrostatic interactions, Pauli repulsive orbital interactions, and attractive orbital interactions, to which a term  $\Delta E_{disp}$  is added to account for the dispersion correction:

$$\Delta E_{int} = \Delta E_{elstat} + \Delta E_{Pauli} + \Delta E_{oi} + \Delta E_{disp} \quad (5)$$

The term  $\Delta E_{elstat}$  corresponds to the classical electrostatic interactions between the unperturbed charge distributions of the prepared (i.e. deformed) fragments and is usually attractive. The Pauli repulsion,  $\Delta E_{Pauli}$ , comprises the destabilizing interactions between occupied orbitals and is responsible for any steric repulsion. The orbital interactions,  $\Delta E_{oi}$ , account for electron-pair bonding, charge transfer and polarization. The term  $\Delta E_{disp}$  accounts for the dispersion corrections.<sup>30,31</sup>

### Analysis of excited states

The quantitative analysis of exciton delocalization and charge transfer in the donor-acceptor complexes was carried out in terms of the transition density.<sup>32-34</sup> The analysis was done in the Löwdin orthogonalized basis, which is more convenient. The matrix  ${}^\lambda\mathbf{C}$  of orthogonalized MO coefficients is obtained from the coefficients  $\mathbf{C}$  in the original basis  ${}^\lambda\mathbf{C} = \mathbf{S}^{1/2} \mathbf{C}$ , where  $\mathbf{S}$  is the atomic orbital overlap matrix. The transition density matrix  $T^{0i}$  for an excited state  $\Phi_i^*$  constructed as a superposition of singly excited configurations (where an occupied MO  $\psi_j$  is replaced a virtual MO  $\psi_a$ ) is computed,

$$T_{\alpha\beta}^{0i} = \sum_{ja} A_{j \rightarrow a} {}^\lambda C_{\alpha j} {}^\lambda C_{\beta a} \quad (6)$$

where  $A_{j \rightarrow a}$  is the expansion coefficient.

A key quantity  $\Omega(D,A)$  is determined by:

$$\Omega(D,A) = \sum_{\alpha \in D, \beta \in A} (T_{\alpha\beta}^{0i})^2 \quad (7)$$

The weights of local excitations on donor (D) and acceptor (A) are  $\Omega(D,D)$  and  $\Omega(A,A)$ . The weights of electron transfer configurations  $D \rightarrow A$  and  $A \rightarrow D$  are represented by  $\Omega(D,A)$  and  $\Omega(A,D)$ , respectively. The index  $\Delta q$ , which describes charge separation and charge transfer between D and A, is

$$\Delta q(CS) = \sum \Omega(D,A) - \Omega(A,D) \quad (8)$$

$$\Delta q(CT) = \sum \Omega(D,A) + \Omega(A,D) \quad (9)$$

## Solvent Effects

The equilibrium solvation energy  $E_S^{\text{eq}}$  of a molecule (in the ground or excited state) in the medium with the dielectric constant  $\epsilon$  was estimated using a COSMO-like polarizable continuum model<sup>35-38</sup> in the monopole approximation:

$$E_S^{\text{eq}}(\mathbf{Q}, \epsilon) = -\frac{1}{2} f(\epsilon) \mathbf{Q}^+ \mathbf{D} \mathbf{Q} \quad (10)$$

where the  $f(\epsilon)$  is the dielectric scaling factor,  $f(\epsilon) = \frac{\epsilon - 1}{\epsilon}$ ,  $\mathbf{Q}$  – the vector of  $n$  atomic charges in the molecular system,  $\mathbf{D}$  is the  $n \times n$  symmetric matrix determined by the shape of the boundary surface between solute and solvent.  $\mathbf{D} = \mathbf{B}^+ \mathbf{A}^{-1} \mathbf{B}$ , where the  $m \times m$  matrix  $\mathbf{A}$  describes electrostatic interaction between  $m$  surface charges and the  $m \times n$   $\mathbf{B}$  matrix describes the interaction of the surface charges with  $n$  atomic charges of the solute.<sup>35,39</sup> The GEPOL93 scheme<sup>40</sup> was used to construct the molecular boundary surface.

The charge on atom X in the excited state  $\Phi_i^*$ ,  $q_X^i$ , was calculated as:

$$q_X^i = q_X^0 + \Delta_X^i, \quad \Delta_X^i = \sum_{Y \neq X} \sum_{\alpha \in X, \beta \in Y} (T_{\alpha\beta}^{0i} T_{\alpha\beta}^{0i} - T_{\beta\alpha}^{0i} T_{\beta\alpha}^{0i}), \quad (11)$$

where  $q_X^0$  is the atomic charge on A in the ground state and  $\Delta_X^i$  is its change due to the redistribution of the electron density between the atoms X and the rest of atoms Y, which is caused by the excitation  $\psi_0 \rightarrow \Phi_i^*$ .

The non-equilibrium solvation energy for excited state  $\Phi_i^*$  can be estimated as:<sup>41</sup>

$$E_S^{\text{neq}}(\mathbf{Q}^0, \Delta, \epsilon, n^2) = f(\epsilon) \Delta^+ \mathbf{D} \mathbf{Q}^0 - \frac{1}{2} f(n^2) \Delta^+ \mathbf{D} \Delta, \quad (12)$$

In Eq. (12),  $n^2$  (the refraction index squared) is the optical dielectric constant of the medium and the vector  $\Delta$  describes the change of atomic charges in the molecule by excitation in terms of atomic charges, see Eq. (11). By definition, the external (solvent) reorganization energy is the difference of the non-equilibrium (Eq. 12) and equilibrium (Eq. 10) solvation energies of the excited state.

## Electron transfer rates

The rate of the nonadiabatic electron transfer (ET),  $k_{\text{ET}}$ , can be expressed in terms of the electronic coupling squared,  $V^2$ , and the Franck-Condon Weighted Density of states (FCWD):

$$k_{\text{ET}} = \frac{2\pi}{\hbar} V^2 (\text{FCWD}) \quad (13)$$

that accounts for the overlap of vibrational states of donor and acceptor and can be approximately estimated using the classical Marcus equation:<sup>42</sup>

$$(FCWD) = (4\pi\lambda kT)^{-1/2} \exp\left[-(\Delta G^0 + \lambda)^2 / 4\lambda kT\right] \quad (14)$$

where  $\lambda$  is the reorganization energy and  $\Delta G^0$  is the standard Gibbs energy change of the process. The fragment charge difference (FCD)<sup>43,44</sup> method was employed to calculate the electronic couplings in this work.

The Marcus expression is derived for the high-temperature condition,  $\hbar\omega_l \ll kT$ , for all vibrational modes  $l$ . The semi-classical description of ET<sup>45,46</sup> includes the effect of the quantum vibrational modes in an effective way, the solvent (low frequency) modes are treated classically, while a single high-frequency intramolecular mode  $\omega_i$ ,  $\hbar\omega_i \gg kT$ , is described quantum mechanically. Because ET occurs normally from the lowest vibrational level of the initial state, the rate  $k$  can be expressed as a sum over all channels connecting the initial state with the vibrational quantum number  $n = 0$  to manifold vibrational levels of the final state,

$$k = \sum_{n=0}^{\infty} k_{0 \rightarrow n}, \text{ where } k_{0 \rightarrow n} = \frac{2\pi}{\hbar} V_{0 \rightarrow n}^2 \frac{1}{\sqrt{4\pi\lambda_s kT}} \exp\left[-\frac{(\Delta G + n\hbar\omega_i + \lambda_s)^2}{4\lambda_s kT}\right] \quad (15)$$

with

$$V_{0 \rightarrow n}^2 = V^2 \frac{S^n}{n!} \exp(-S) \quad (16)$$

An effective value of the Huang-Rhys factor  $S$  is estimated from the internal reorganization energy  $\lambda_i$ ,

$$S = \lambda_i / \hbar\omega_i$$

As seen, an additional parameter (as compared to the Marcus equation) enters the semi-classical expression - the frequency  $\omega_i$  of a vibrational mode that effectively describes the nuclear intramolecular relaxation following the ET. Typically, in organic systems (including fullerene and nanotube derivatives) the main contribution to the internal reorganization energy is due to stretching of C=C bonds (the corresponding frequencies are found to be in the range of 1400-1800  $\text{cm}^{-1}$ ). It was established that varying the effective frequency from 1400 to 1800  $\text{cm}^{-1}$  does not significantly affect the electron transfer rate for similar systems.<sup>47-49</sup> Thus, the effective frequency was set to 1600  $\text{cm}^{-1}$ . We have demonstrated that varying the parameter  $\omega_i$  within a reasonable range does not change significantly the computed ET rate.

## Reorganization energy

The reorganization energy is usually divided into two parts,  $\lambda = \lambda_i + \lambda_s$ , including the internal and solvent terms. The solvent reorganization energy corresponds to the energy required to move solvent molecules from the position they occupy in the initial state to the location they have in the CT state, but without charge transfer having occurred. The  $\lambda_s$  for a particular CT state was computed as a difference between the equilibrium ( $E_s^{\text{eq}}$ , see eq. 10) and non-equilibrium ( $E_s^{\text{neq}}$ , see eq. 12) solvation energies. The internal

reorganization energy  $\lambda_i$  corresponds to the energy of structural changes when donor/acceptor fragments going from initial-state geometries to final-state geometries.

$\lambda_i = \lambda_i^1 + \lambda_i^2$ , where :

$$\lambda_i^1(C_{60}^* \rightarrow C_{60}^-) = \frac{1}{2} \left[ \left( (C_{60}^*)_+ - (C_{60}^*)_- \right) + \left( (C_{60}^-)_* - (C_{60}^-)_- \right) \right] \quad (17)$$

$$\lambda_i^2(CNB^0 \rightarrow CNB^+) = \frac{1}{2} \left[ \left( (CNB^0)_+ - (CNB^0)_0 \right) + \left( (CNB^+)_0 - (CNB^+)_+ \right) \right]$$

### Activation energy

The activation energies of the electron transfer reactions were computed based on the traditional Marcus theory and can be expressed as:

$$\Delta G^\ddagger = (\lambda + \Delta G^0)^2 / 4\lambda \quad (18)$$

### Interaction energies

The interaction energies were calculated directly from the electronic energy of complex and electronic energies of its subsystems. For  $Host \supset C_{60}$ , the interaction energy can be expressed as follows:

$$E_{int} = E_{Host \supset C_{60}} - (E_{Host} + E_{C_{60}}) \quad (19)$$

### Quantum Theory of Atoms in Molecules (QTAIM)

Topological analysis of the electron density distributions was conducted using the “Quantum Theory of Atoms in Molecules” (QTAIM) approach proposed by Bader.<sup>50,51</sup> Electron density properties measured at the bond critical point (BCP) give information about the character of different chemical bonds.<sup>52-54</sup> The AIMALL suite of programs<sup>55</sup> was applied to evaluate BCP properties and associated bond descriptors – electron density [ $\rho(r)$ ] in BCPs, its Laplacian [ $\nabla^2 \rho(r)$ ], potential energy density [ $V(r)$ ], kinetic energy density [ $G(r)$ ], and total electron energy density [ $H(r)$ ].

### Non-covalent interaction (NCI) index

The NCI method<sup>56-58</sup> relies on two scalar fields to map local bonding properties: the electron density ( $\rho$ ) and the reduced-density gradient (RDG,  $s$ ) defined as:

$$s = \frac{1}{2(3\pi)^{1/3}} \frac{|\nabla \rho|}{\rho^{4/3}} \quad (20)$$

The combination of  $s$  and  $\rho$  allows a rough partition of real space into bonding regions: high- $s$  low- $\rho$  corresponds to non-interacting density tails, low- $s$  high- $\rho$  to covalent bonds, and low- $s$  low- $\rho$  to non-

covalent interactions. The NCI analysis was carried out at the CAM-B3LYP/def2-SVP//B3LYP-D3(BJ)/def2-SVP level using Multiwfn program.<sup>59</sup>

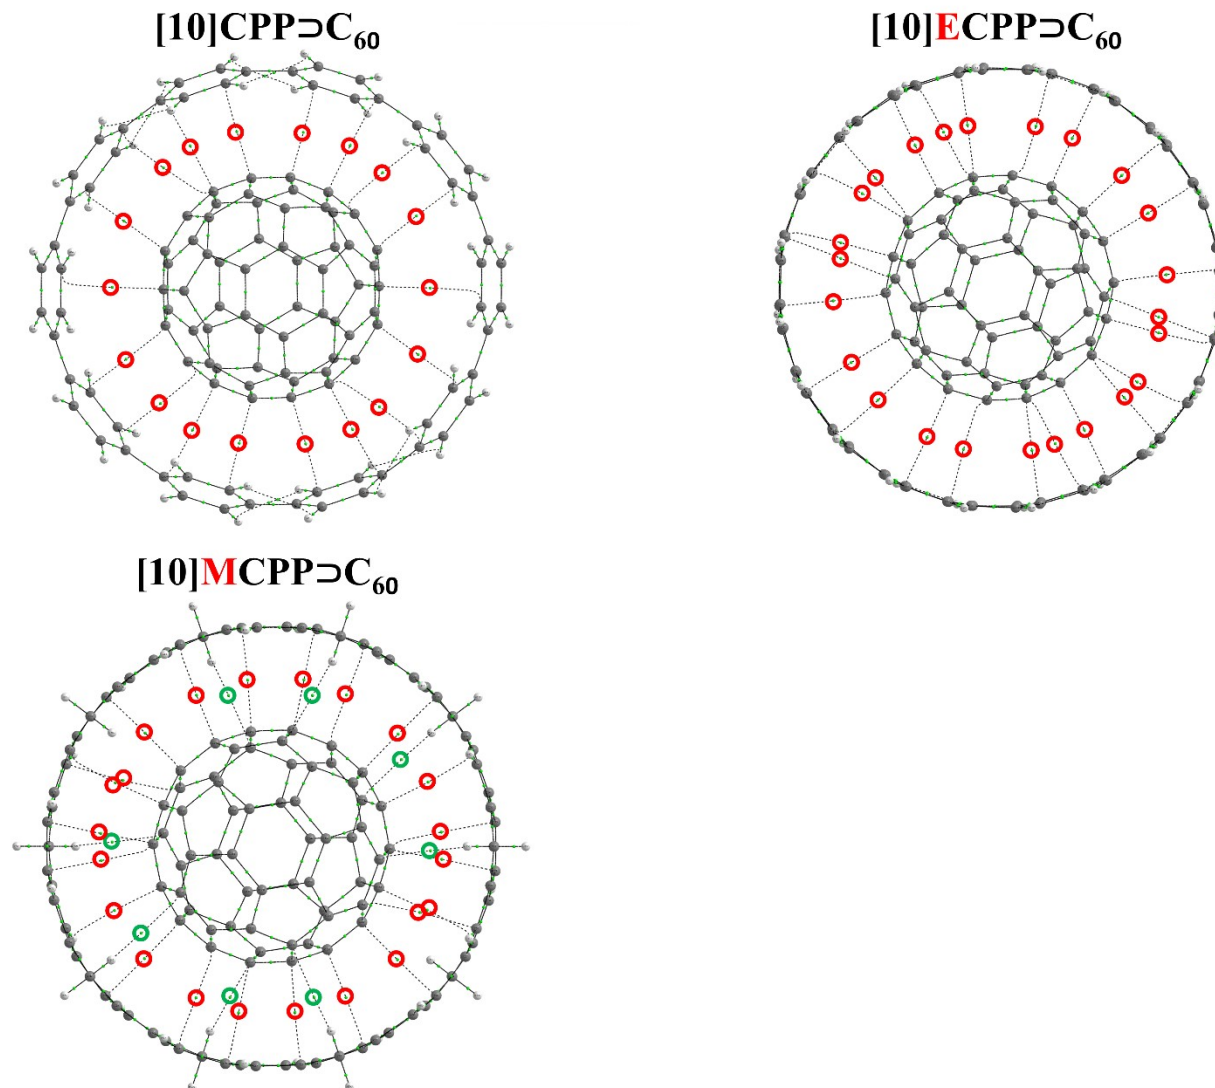

**Figure S1.** QTAIM molecular graph for [10]CPP⊃C<sub>60</sub>, [10]MCP⊃C<sub>60</sub>, and [10]ECPP⊃C<sub>60</sub> complexes. Lines connecting the nuclei are the bond paths. Small green dots correspond to BCPs. BCPs of interest are marked by red and green circles. Red circles correspond to C···C contacts, green to H···C contacts.



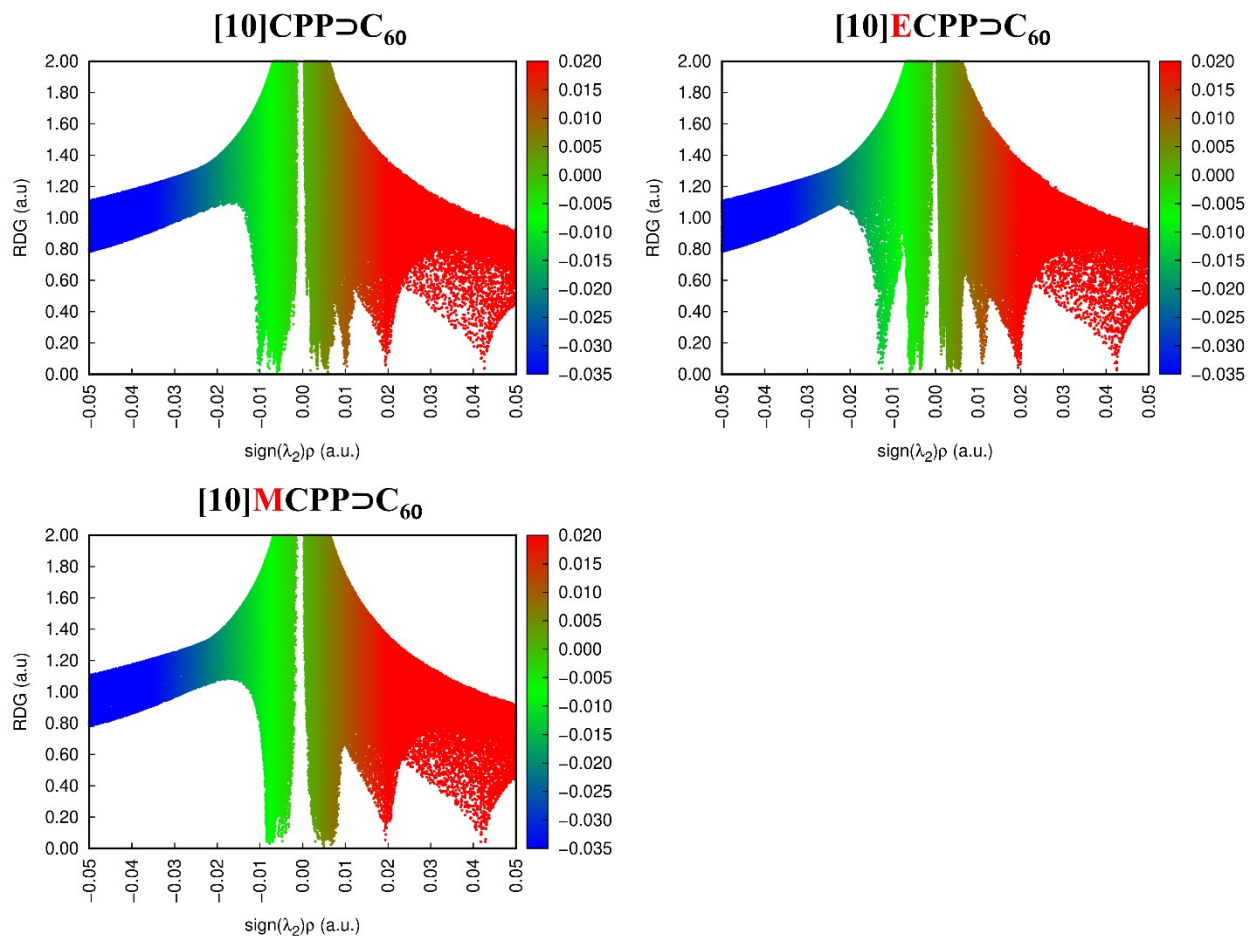

Figure S2. Plot of RDG vs.  $\text{sign}(\lambda_2)\rho$  for [10]CPP $\supset$ C<sub>60</sub>, [10]MCPPE $\supset$ C<sub>60</sub>, and [10]ECPP $\supset$ C<sub>60</sub> complexes.

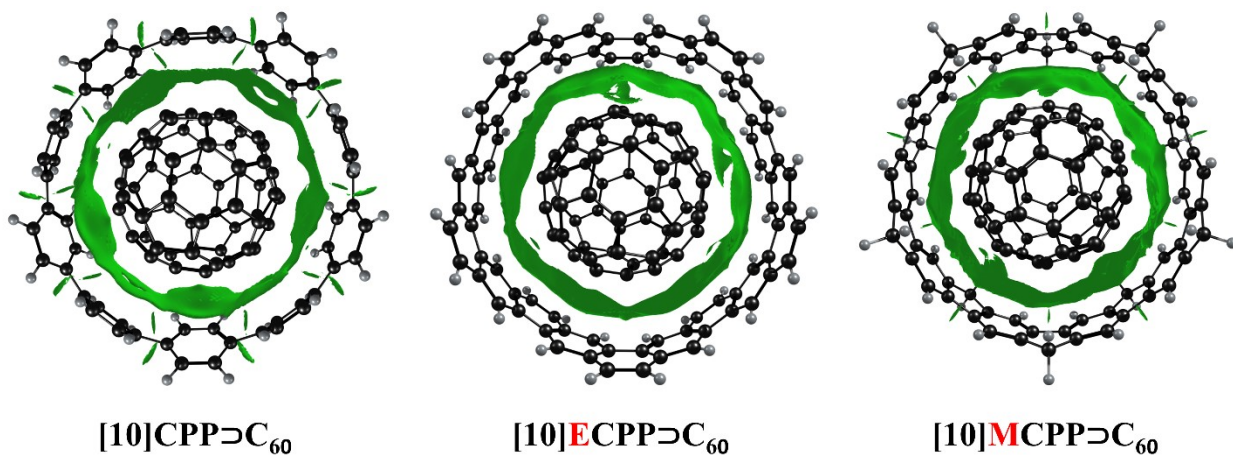

Figure S3. NCI isosurfaces of van der Waals interactions for [10]CPP $\supset$ C<sub>60</sub>, [10]MCPPE $\supset$ C<sub>60</sub>, and [10]ECPP $\supset$ C<sub>60</sub> complexes. Isosurfaces were generated for RDG = 0.65 a.u.

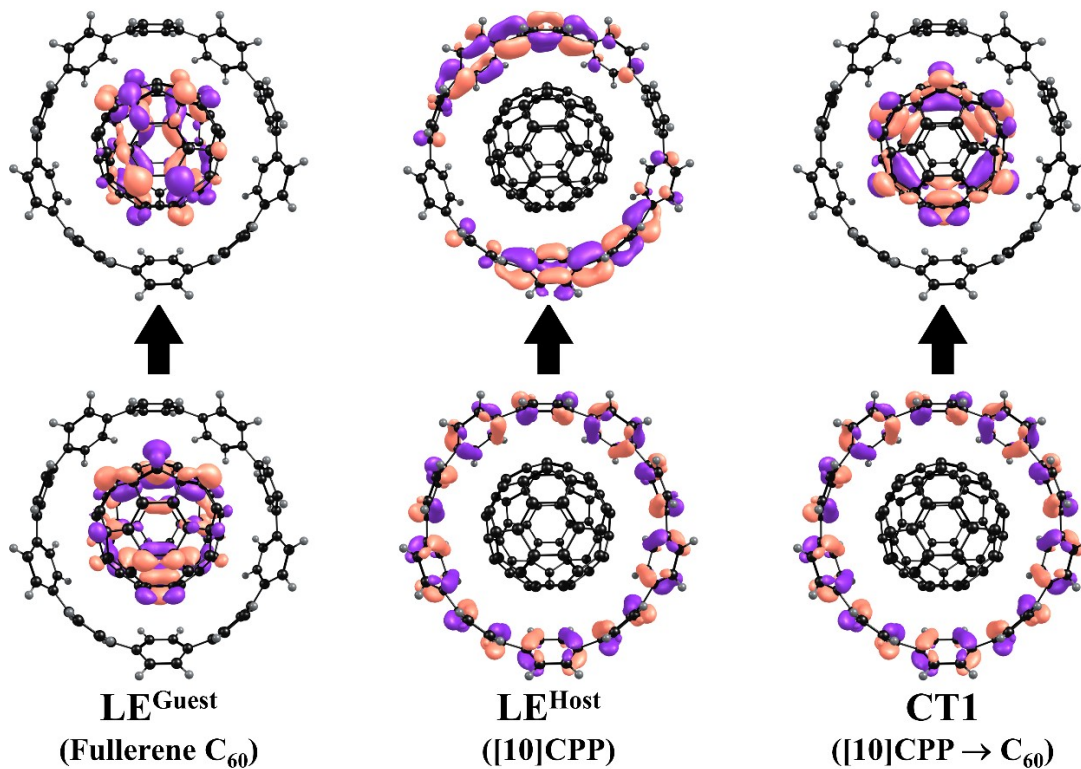

Figure S4. Frontier molecular orbitals representing  $LE^{Guest}$ ,  $LE^{Host}$ , and CT states in  $[10]CPP \supset C_{60}$  complex.

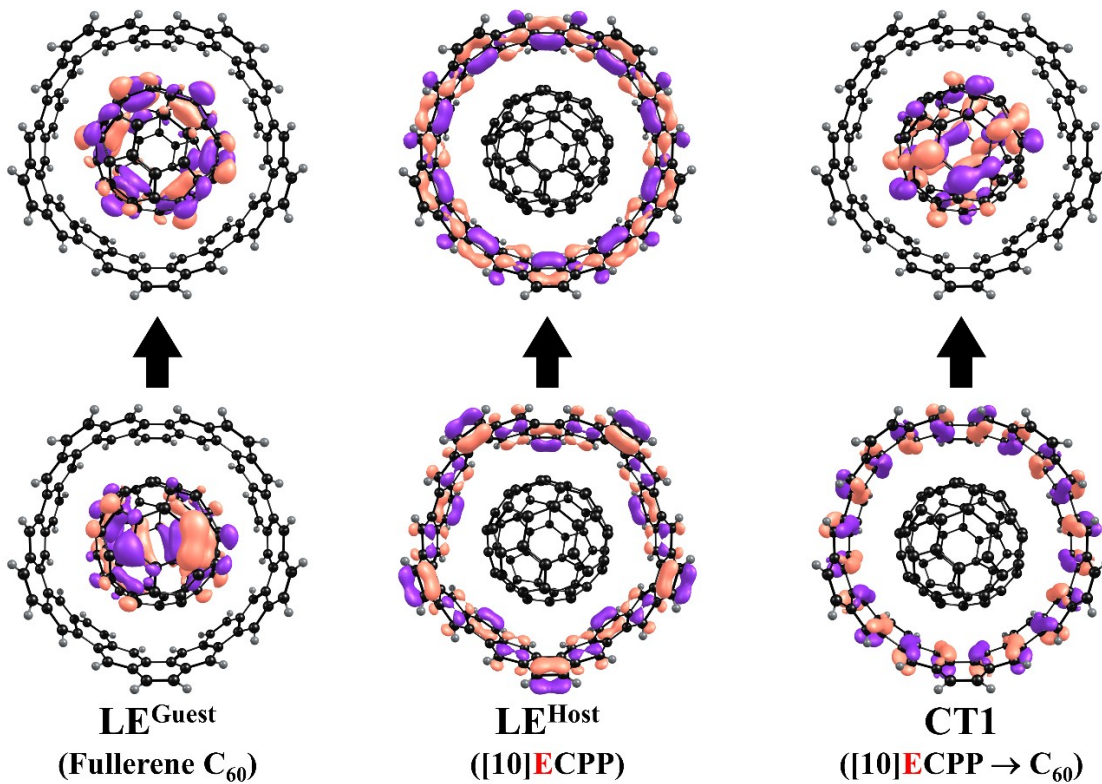

Figure S5. Frontier molecular orbitals representing  $LE^{Guest}$ ,  $LE^{Host}$ , and CT states in  $[10]ECPP \supset C_{60}$  complex.

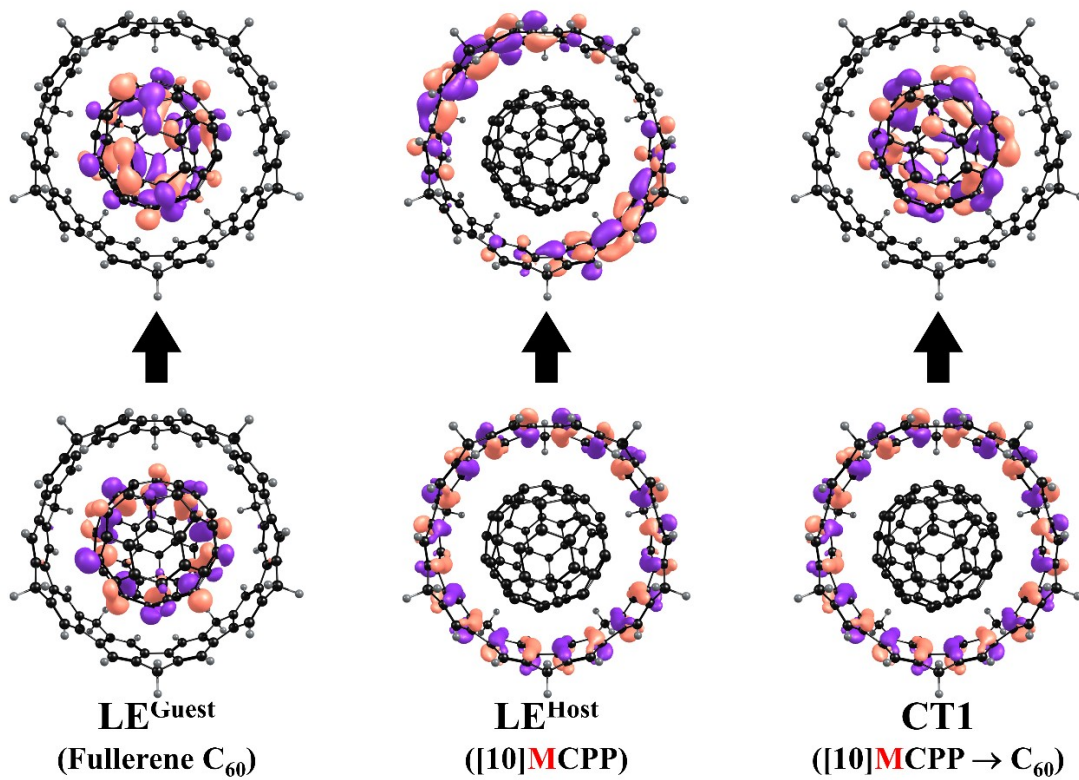

Figure S6. Frontier molecular orbitals representing LE<sup>Guest</sup>, LE<sup>Host</sup>, and CT states in [10]MCPP⊃C<sub>60</sub> complex.

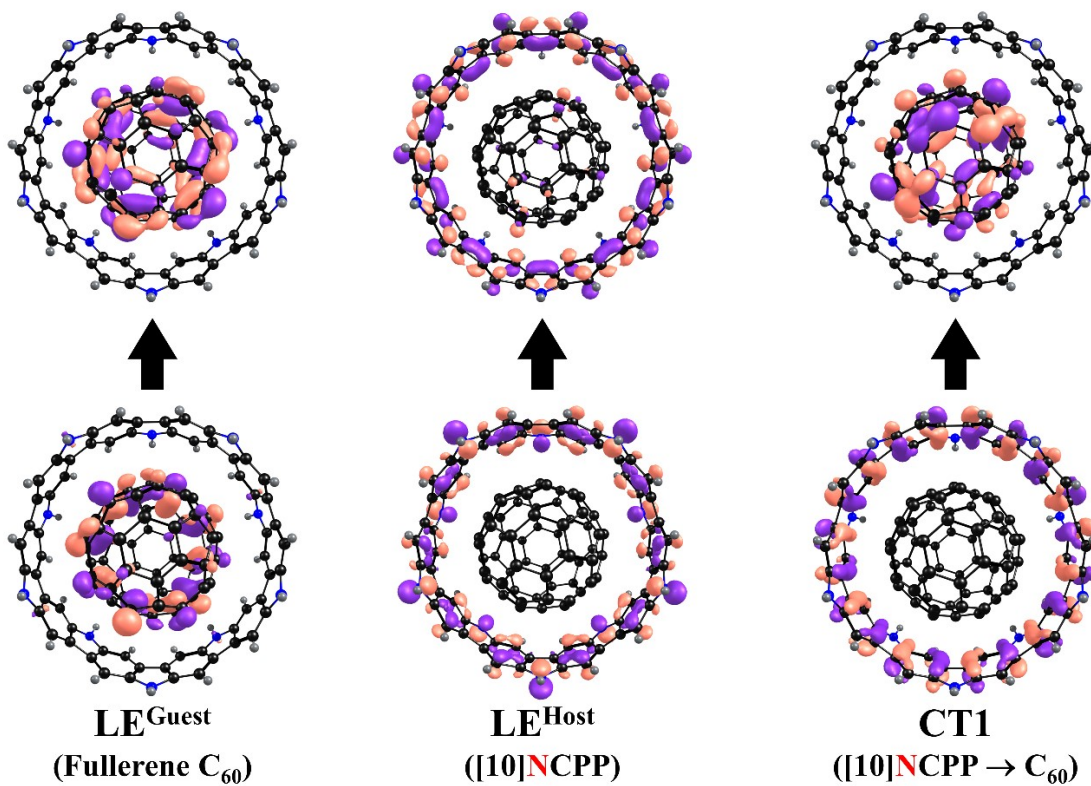

Figure S7. Frontier molecular orbitals representing LE<sup>Guest</sup>, LE<sup>Host</sup>, and CT states in [10]NCPP⊃C<sub>60</sub> complex.



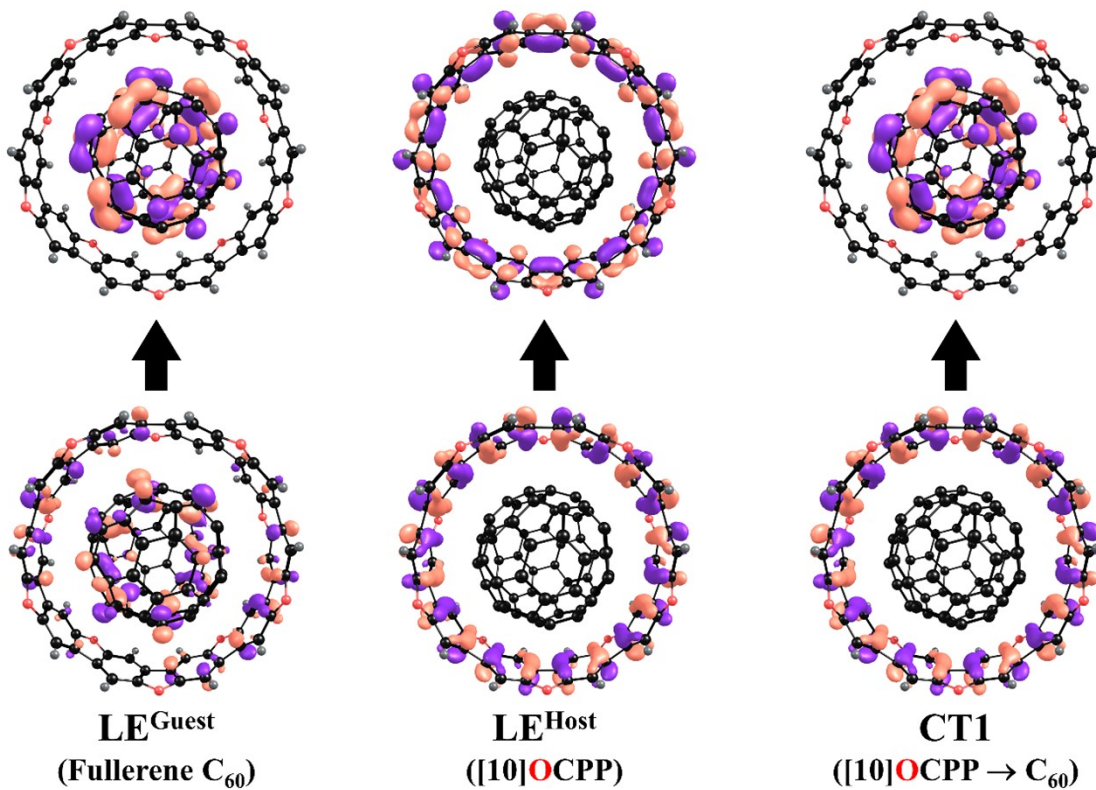

**Figure S8.** Frontier molecular orbitals representing LE<sup>Guest</sup>, LE<sup>Host</sup>, and CT states in [10]OCPP $\rightarrow$ C<sub>60</sub> complex.

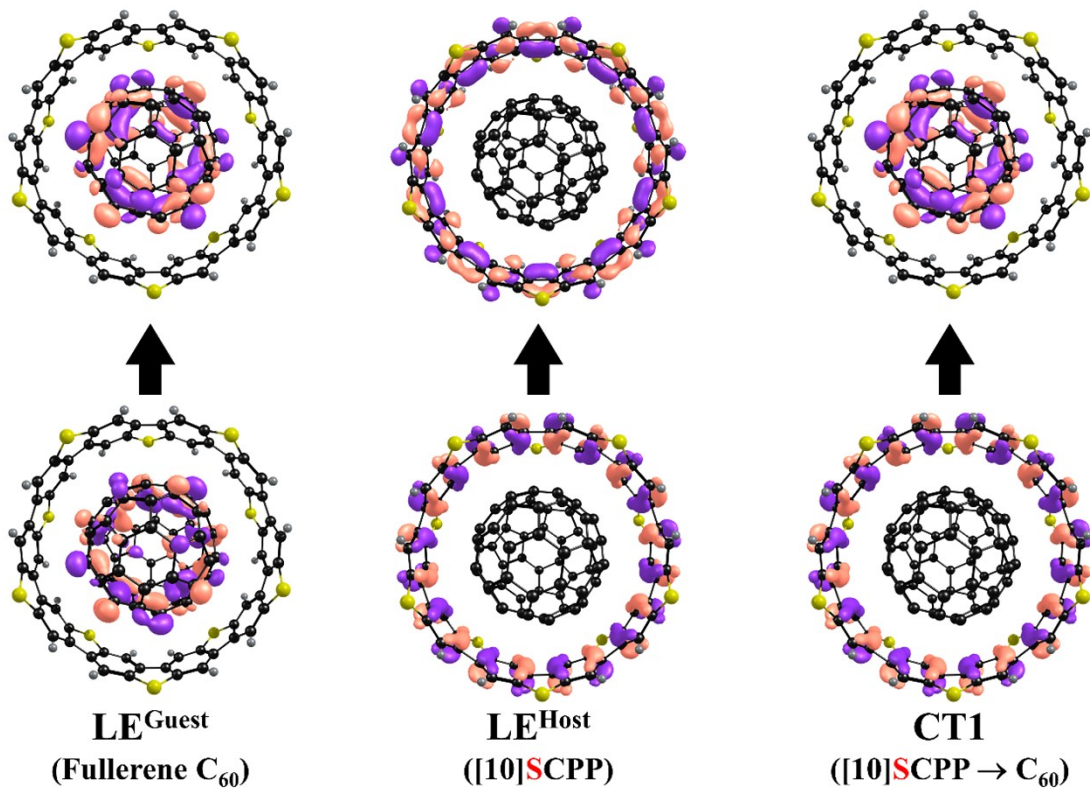

**Figure S9.** Frontier molecular orbitals representing LE<sup>Guest</sup>, LE<sup>Host</sup>, and CT states in [10]SCPP $\rightarrow$ C<sub>60</sub> complex.

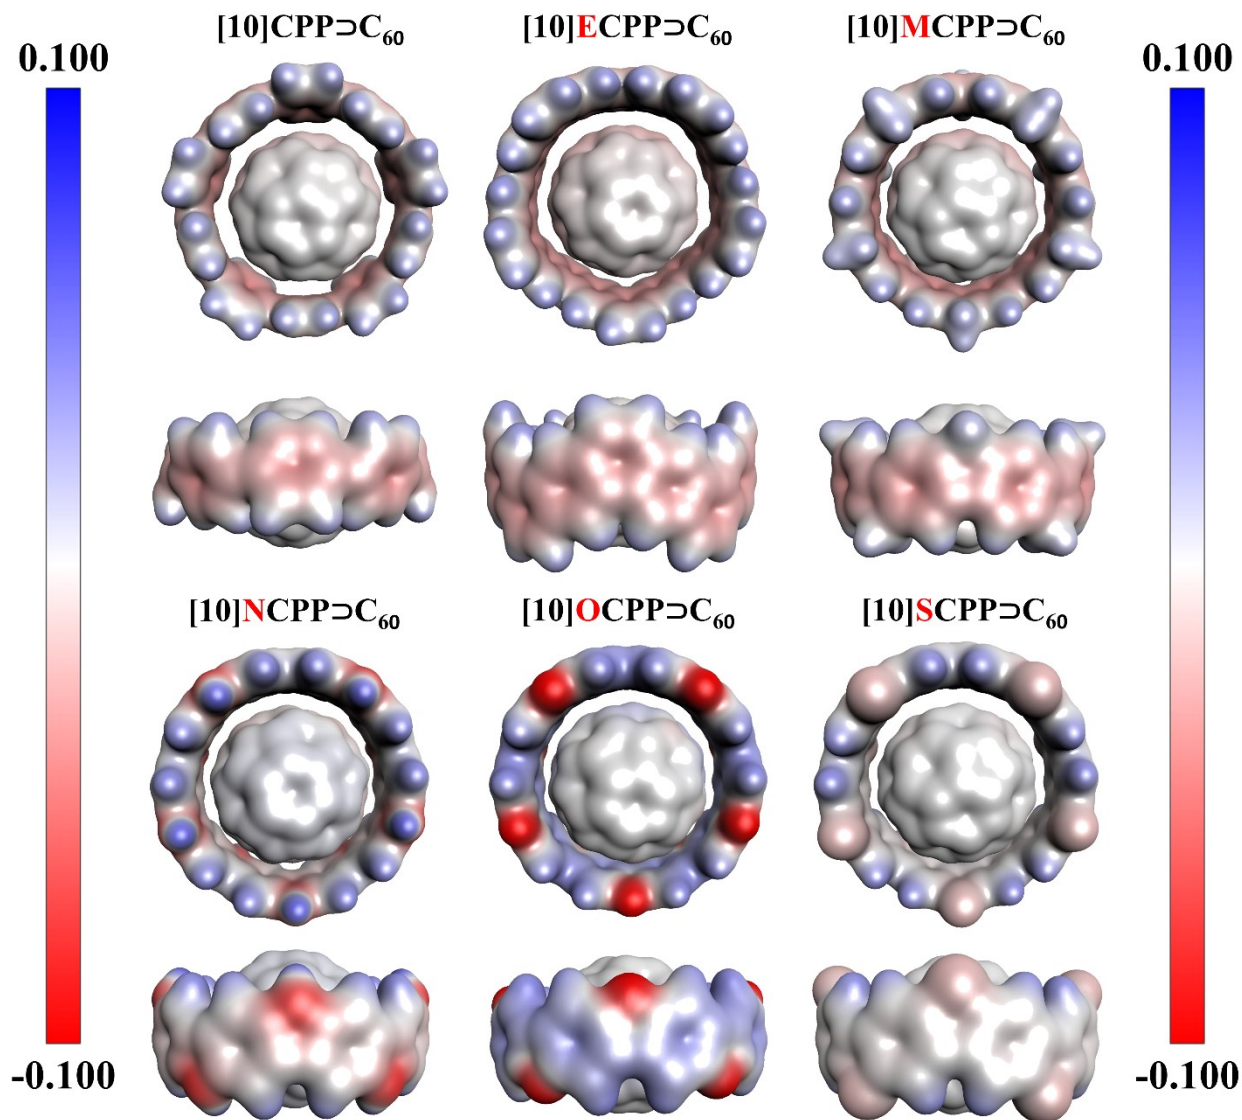

**Figure S10.** Calculated molecular electrostatic potential (MEP) surfaces for [10]CPP⊃C<sub>60</sub>, [10]ECPP⊃C<sub>60</sub>, [10]MCPPE⊃C<sub>60</sub>, [10]NCPPE⊃C<sub>60</sub>, [10]OCPPE⊃C<sub>60</sub>, and [10]SCPPE⊃C<sub>60</sub> complexes. The surfaces are drawn at electron density contours of 0.02 e/Å<sup>3</sup> and colored according to the electrostatic potential value.

**Table S1.** Charge separation (in electrons) between the fragments in electronic ground state for [10]CPP $\supset$ C<sub>60</sub>, [10]MCP $\supset$ C<sub>60</sub>, and [10]ECP $\supset$ C<sub>60</sub> complexes.  $Q_{Host}$  - charge on host ([10]CPP, [10]MCP or [10]ECP), and  $Q_{C_{60}}$  - charge on fullerene moiety. Total charge of the complexes  $Q_{Tot} = 0$ .

| Charge Scheme | [10]CPP $\supset$ C <sub>60</sub> |              | [10]MCP $\supset$ C <sub>60</sub> |              | [10]ECP $\supset$ C <sub>60</sub> |              |
|---------------|-----------------------------------|--------------|-----------------------------------|--------------|-----------------------------------|--------------|
|               | $Q_{Host}$                        | $Q_{C_{60}}$ | $Q_{Host}$                        | $Q_{C_{60}}$ | $Q_{Host}$                        | $Q_{C_{60}}$ |
| Mulliken      | 0.024                             | -0.024       | 0.029                             | -0.029       | 0.011                             | -0.011       |
| Lowdin        | 0.011                             | -0.011       | 0.033                             | -0.033       | 0.028                             | -0.028       |
| Hirshfeld     | -0.084                            | 0.084        | -0.120                            | 0.120        | -0.040                            | 0.040        |
| CM5           | -0.073                            | 0.073        | -0.106                            | 0.106        | -0.036                            | 0.036        |
| NPA           | 0.073                             | -0.073       | 0.133                             | -0.133       | 0.097                             | -0.097       |

**Table S2.** Interaction energy (in kcal/mol) for [10]CPP $\supset$ C<sub>60</sub>, [10]ECP $\supset$ C<sub>60</sub>, and [10]MCP $\supset$ C<sub>60</sub>, complexes computed using B3LYP functional and different basis sets.

| System                            | DZP     | TZP    | TZ2P   | QZ4P   |
|-----------------------------------|---------|--------|--------|--------|
| [10]CPP $\supset$ C <sub>60</sub> | -95.24  | -52.2  | -51.94 | -52.89 |
| [10]ECP $\supset$ C <sub>60</sub> | -115.18 | -65.11 | -65.26 | -66.93 |
| [10]MCP $\supset$ C <sub>60</sub> | -123.66 | -67.45 | -66.94 | -68.03 |

**Table S3.** Parameters (electron density [ $\rho(r)$ ], its Laplacian [ $\nabla^2\rho(r)$ ], potential energy density [ $V(r)$ ], kinetic energy density [ $G(r)$ ], and total electron energy density [ $H(r)$ ] for selected bond critical points related to non-covalent interactions in [10]CPP $\supset$ C<sub>60</sub>, [10]MCP $\supset$ C<sub>60</sub>, and [10]ECP $\supset$ C<sub>60</sub> complexes computed in the gas phase.

| Bond critical points between fragments | Interaction | $\rho(r)$ , au                    | $\nabla^2\rho(r)$ , au | $V(r)$ , au | $G(r)$ , au | $H(r)$ , au |
|----------------------------------------|-------------|-----------------------------------|------------------------|-------------|-------------|-------------|
|                                        |             | [10]CPP $\supset$ C <sub>60</sub> |                        |             |             |             |
| [10]CPP ... C <sub>60</sub>            | C...C       | 6.88E-03                          | 1.83E-02               | -2.82E-03   | 3.70E-03    | 8.84E-04    |
|                                        |             | 5.59E-03                          | 1.45E-02               | -2.41E-03   | 3.01E-03    | 6.05E-04    |
|                                        |             | 5.67E-03                          | 1.50E-02               | -2.46E-03   | 3.11E-03    | 6.48E-04    |
|                                        |             | 5.56E-03                          | 1.55E-02               | -2.52E-03   | 3.20E-03    | 6.81E-04    |
|                                        |             | 8.15E-03                          | 2.33E-02               | -3.57E-03   | 4.70E-03    | 1.13E-03    |
|                                        |             | 7.81E-03                          | 2.20E-02               | -3.37E-03   | 4.43E-03    | 1.06E-03    |
|                                        |             | 6.04E-03                          | 1.72E-02               | -2.73E-03   | 3.52E-03    | 7.85E-04    |
|                                        |             | 5.47E-03                          | 1.48E-02               | -2.45E-03   | 3.07E-03    | 6.25E-04    |
|                                        |             | 5.92E-03                          | 1.58E-02               | -2.57E-03   | 3.26E-03    | 6.93E-04    |
|                                        |             | 6.84E-03                          | 1.82E-02               | -2.80E-03   | 3.68E-03    | 8.74E-04    |
|                                        |             | 5.55E-03                          | 1.44E-02               | -2.39E-03   | 2.99E-03    | 5.99E-04    |
|                                        |             | 5.64E-03                          | 1.49E-02               | -2.45E-03   | 3.09E-03    | 6.44E-04    |
|                                        |             | 5.62E-03                          | 1.57E-02               | -2.55E-03   | 3.24E-03    | 6.91E-04    |
| 8.23E-03                               | 2.36E-02    | -3.62E-03                         | 4.76E-03               | 1.14E-03    |             |             |
| 7.78E-03                               | 2.19E-02    | -3.36E-03                         | 4.42E-03               | 1.05E-03    |             |             |

|                                    |          |                                |           |           |           |          |          |
|------------------------------------|----------|--------------------------------|-----------|-----------|-----------|----------|----------|
|                                    |          | 6.01E-03                       | 1.71E-02  | -2.72E-03 | 3.50E-03  | 7.80E-04 |          |
|                                    |          | 5.48E-03                       | 1.47E-02  | -2.44E-03 | 3.06E-03  | 6.23E-04 |          |
|                                    |          | 5.96E-03                       | 1.59E-02  | -2.58E-03 | 3.27E-03  | 6.97E-04 |          |
|                                    |          | <b>[10]MCPD→C<sub>60</sub></b> |           |           |           |          |          |
| <b>[10]MCPD ... C<sub>60</sub></b> | C...C    | 8.52E-03                       | 2.54E-02  | -4.03E-03 | 5.19E-03  | 1.16E-03 |          |
|                                    |          | 7.00E-03                       | 1.92E-02  | -3.09E-03 | 3.95E-03  | 8.58E-04 |          |
|                                    |          | 7.12E-03                       | 2.14E-02  | -3.39E-03 | 4.38E-03  | 9.82E-04 |          |
|                                    |          | 7.14E-03                       | 2.03E-02  | -3.30E-03 | 4.19E-03  | 8.87E-04 |          |
|                                    |          | 7.08E-03                       | 1.98E-02  | -3.21E-03 | 4.09E-03  | 8.72E-04 |          |
|                                    |          | 7.76E-03                       | 2.35E-02  | -3.68E-03 | 4.78E-03  | 1.10E-03 |          |
|                                    |          | 7.98E-03                       | 2.34E-02  | -3.75E-03 | 4.79E-03  | 1.05E-03 |          |
|                                    |          | 8.40E-03                       | 2.51E-02  | -3.98E-03 | 5.12E-03  | 1.15E-03 |          |
|                                    |          | 8.36E-03                       | 2.42E-02  | -3.85E-03 | 4.94E-03  | 1.10E-03 |          |
|                                    |          | 8.56E-03                       | 2.58E-02  | -4.07E-03 | 5.25E-03  | 1.19E-03 |          |
|                                    |          | 8.54E-03                       | 2.55E-02  | -4.04E-03 | 5.20E-03  | 1.17E-03 |          |
|                                    |          | 7.11E-03                       | 2.14E-02  | -3.39E-03 | 4.37E-03  | 9.78E-04 |          |
|                                    |          | 7.13E-03                       | 2.02E-02  | -3.29E-03 | 4.18E-03  | 8.84E-04 |          |
|                                    |          | 7.76E-03                       | 2.35E-02  | -3.68E-03 | 4.77E-03  | 1.09E-03 |          |
|                                    |          | 7.97E-03                       | 2.33E-02  | -3.75E-03 | 4.79E-03  | 1.04E-03 |          |
|                                    |          | 8.40E-03                       | 2.50E-02  | -3.97E-03 | 5.12E-03  | 1.15E-03 |          |
|                                    |          | 4.95E-03                       | 1.27E-02  | -2.16E-03 | 2.67E-03  | 5.06E-04 |          |
|                                    |          | 6.99E-03                       | 1.92E-02  | -3.09E-03 | 3.95E-03  | 8.57E-04 |          |
|                                    | 7.05E-03 | 1.98E-02                       | -3.21E-03 | 4.07E-03  | 8.68E-04  |          |          |
|                                    | 8.55E-03 | 2.57E-02                       | -4.06E-03 | 5.25E-03  | 1.19E-03  |          |          |
|                                    | 4.95E-03 | 1.27E-02                       | -2.16E-03 | 2.67E-03  | 5.05E-04  |          |          |
|                                    | 8.36E-03 | 2.41E-02                       | -3.84E-03 | 4.94E-03  | 1.10E-03  |          |          |
|                                    |          | H...C                          | 3.98E-03  | 1.27E-02  | -1.72E-03 | 2.45E-03 | 7.28E-04 |
|                                    |          |                                | 4.23E-03  | 1.35E-02  | -1.85E-03 | 2.61E-03 | 7.57E-04 |
|                                    |          |                                | 4.88E-03  | 1.54E-02  | -2.14E-03 | 2.99E-03 | 8.54E-04 |
|                                    |          |                                | 4.79E-03  | 1.57E-02  | -2.11E-03 | 3.02E-03 | 9.04E-04 |
|                                    | 3.95E-03 |                                | 1.26E-02  | -1.71E-03 | 2.43E-03  | 7.25E-04 |          |
|                                    | 4.25E-03 |                                | 1.35E-02  | -1.86E-03 | 2.62E-03  | 7.60E-04 |          |
|                                    | 4.86E-03 |                                | 1.53E-02  | -2.13E-03 | 2.98E-03  | 8.54E-04 |          |
|                                    | 4.77E-03 |                                | 1.56E-02  | -2.10E-03 | 3.00E-03  | 9.01E-04 |          |
|                                    |          | <b>[10]ECPP→C<sub>60</sub></b> |           |           |           |          |          |
| <b>[10]ECPP ... C<sub>60</sub></b> | C...C    | 5.99E-03                       | 1.67E-02  | -2.67E-03 | 3.42E-03  | 7.57E-04 |          |
|                                    |          | 5.64E-03                       | 1.55E-02  | -2.52E-03 | 3.20E-03  | 6.80E-04 |          |
|                                    |          | 5.44E-03                       | 1.47E-02  | -2.45E-03 | 3.06E-03  | 6.07E-04 |          |
|                                    |          | 6.07E-03                       | 1.69E-02  | -2.73E-03 | 3.47E-03  | 7.44E-04 |          |
|                                    |          | 5.96E-03                       | 1.76E-02  | -2.74E-03 | 3.57E-03  | 8.28E-04 |          |
|                                    |          | 5.10E-03                       | 1.30E-02  | -2.19E-03 | 2.72E-03  | 5.33E-04 |          |
|                                    |          | 3.56E-03                       | 9.80E-03  | -1.69E-03 | 2.07E-03  | 3.82E-04 |          |
|                                    |          | 6.04E-03                       | 1.67E-02  | -2.67E-03 | 3.41E-03  | 7.48E-04 |          |
|                                    |          | 5.85E-03                       | 1.61E-02  | -2.61E-03 | 3.32E-03  | 7.07E-04 |          |
|                                    |          | 5.73E-03                       | 1.56E-02  | -2.52E-03 | 3.21E-03  | 6.88E-04 |          |

|  |  |          |          |           |          |          |
|--|--|----------|----------|-----------|----------|----------|
|  |  | 6.32E-03 | 1.79E-02 | -2.86E-03 | 3.67E-03 | 8.09E-04 |
|  |  | 5.82E-03 | 1.51E-02 | -2.57E-03 | 3.18E-03 | 6.08E-04 |
|  |  | 6.01E-03 | 1.68E-02 | -2.68E-03 | 3.44E-03 | 7.62E-04 |
|  |  | 5.66E-03 | 1.56E-02 | -2.53E-03 | 3.22E-03 | 6.89E-04 |
|  |  | 5.46E-03 | 1.47E-02 | -2.46E-03 | 3.07E-03 | 6.09E-04 |
|  |  | 6.07E-03 | 1.69E-02 | -2.73E-03 | 3.47E-03 | 7.44E-04 |
|  |  | 5.96E-03 | 1.76E-02 | -2.74E-03 | 3.57E-03 | 8.29E-04 |
|  |  | 5.10E-03 | 1.30E-02 | -2.19E-03 | 2.72E-03 | 5.33E-04 |
|  |  | 3.56E-03 | 9.79E-03 | -1.68E-03 | 2.07E-03 | 3.82E-04 |
|  |  | 6.04E-03 | 1.67E-02 | -2.67E-03 | 3.42E-03 | 7.49E-04 |
|  |  | 5.84E-03 | 1.61E-02 | -2.61E-03 | 3.32E-03 | 7.06E-04 |
|  |  | 5.73E-03 | 1.56E-02 | -2.53E-03 | 3.22E-03 | 6.89E-04 |
|  |  | 6.32E-03 | 1.79E-02 | -2.86E-03 | 3.67E-03 | 8.07E-04 |
|  |  | 5.81E-03 | 1.51E-02 | -2.56E-03 | 3.17E-03 | 6.06E-04 |

**Table S4.** EDA results for [10]MCPD>C<sub>60</sub>, [10]NCPD>C<sub>60</sub>, [10]OCPD>C<sub>60</sub>, and [10]SCPD>C<sub>60</sub> complexes.

| Complex                  | Energy terms, kcal/mol <sup>[a]</sup> |                            |                        |                          |                         |
|--------------------------|---------------------------------------|----------------------------|------------------------|--------------------------|-------------------------|
|                          | $\Delta E_{\text{Pauli}}$             | $\Delta E_{\text{elstat}}$ | $\Delta E_{\text{oi}}$ | $\Delta E_{\text{disp}}$ | $\Delta E_{\text{int}}$ |
| [10]MCPD>C <sub>60</sub> | 107.24                                | -54.54 (31%)               | -23.00 (13%)           | -96.63 (55%)             | -66.94                  |
| [10]NCPD>C <sub>60</sub> | 118.48                                | -61.10 (33%)               | -26.77 (14%)           | -97.40 (53%)             | -66.79                  |
| [10]OCPD>C <sub>60</sub> | 129.31                                | -63.90 (35%)               | -25.29 (14%)           | -95.97 (52%)             | -55.85                  |
| [10]SCPD>C <sub>60</sub> | 93.81                                 | -46.21 (29%)               | -18.33 (11%)           | -97.34 (60%)             | -68.07                  |

<sup>[a]</sup> The percentage contributions to the sum of all attractive energy terms ( $\Delta E_{\text{elstat}} + \Delta E_{\text{oi}} + \Delta E_{\text{disp}}$ ) are listed in parentheses.

**Table S5.** Excitation energies ( $E_x$ , eV) and dipole moments in the ground state ( $\mu_0$ , D), change in dipole moments between the GS and state of interest ( $\Delta\mu = \mu_i - \mu_0$ , D), as well as solvation energies ( $E_{\text{solv}}$ , eV) in DCM calculated for [10]CPD>C<sub>60</sub>, [10]ECPD>C<sub>60</sub>, [10]MCPD>C<sub>60</sub>, [10]NCPD>C<sub>60</sub>, [10]OCPD>C<sub>60</sub> and [10]SCPD>C<sub>60</sub> complexes.

|                   | Supramolecular host-guest system               |                          |                          |                          |                          |                          |
|-------------------|------------------------------------------------|--------------------------|--------------------------|--------------------------|--------------------------|--------------------------|
|                   | [10]CPD>C <sub>60</sub>                        | [10]ECPD>C <sub>60</sub> | [10]MCPD>C <sub>60</sub> | [10]NCPD>C <sub>60</sub> | [10]OCPD>C <sub>60</sub> | [10]SCPD>C <sub>60</sub> |
|                   | Ground state (GS)                              |                          |                          |                          |                          |                          |
| $E_x$             | 0.000                                          | 0.000                    | 0.000                    | 0.000                    | 0.000                    | 0.000                    |
| $\mu_0$           | 0.006                                          | 0.004                    | 0.007                    | 0.004                    | 0.004                    | 0.004                    |
| $E_{\text{solv}}$ | -0.394                                         | -0.522                   | -0.389                   | -0.979                   | -0.437                   | -0.515                   |
|                   | $LE^{\text{Guest}}(\text{C}_{60})$             |                          |                          |                          |                          |                          |
| $E_x$             | 2.545                                          | 2.564                    | 2.530                    | 2.559                    | 2.532                    | 2.537                    |
| $\Delta\mu$       | 0.03                                           | 0.02                     | 0.05                     | 0.02                     | 0.05                     | 0.01                     |
| $E_{\text{solv}}$ | -0.395                                         | -0.520                   | -0.382                   | -0.934                   | -0.431                   | -0.517                   |
|                   | $LE^{\text{Host}}([\mathbf{10}]\mathbf{XCPD})$ |                          |                          |                          |                          |                          |



|                                                              |        |        |        |        |        |        |
|--------------------------------------------------------------|--------|--------|--------|--------|--------|--------|
| $E_x$                                                        | 3.501  | 3.271  | 3.016  | 3.121  | 3.056  | 2.915  |
| $\Delta\mu$                                                  | 0.04   | 0.02   | 0.02   | 0.05   | 0.02   | 0.03   |
| $E_{\text{solv}}$                                            | -0.386 | -0.525 | -0.382 | -1.032 | -0.418 | -0.754 |
| <b>CT ([10]XCPP <math>\rightarrow</math> C<sub>60</sub>)</b> |        |        |        |        |        |        |
| $E_x$                                                        | 2.685  | 2.675  | 2.160  | 2.215  | 2.642  | 2.776  |
| $\Delta\mu$                                                  | 0.09   | 0.03   | 0.06   | 0.03   | 0.15   | 0.03   |
| $E_{\text{solv}}$                                            | -0.468 | -0.663 | -0.412 | -0.865 | -0.479 | -0.598 |

**Table S6.** Computed semi-classical rates ( $k_x$  in  $s^{-1}$ ) and characteristic times ( $\tau$  in ns) for the ET process in [10]MCP $\supset$ C<sub>60</sub> and [10]NCP $\supset$ C<sub>60</sub> complexes in DCM solution using different effective Huang-Rhys ( $S_{\text{eff}}$ ) factors.

| $\hbar\omega_{\text{eff}}$                       | $\Delta G^0$ , eV | $ V_{ij} $ , eV      | $\lambda_{\text{solv}}$ , eV | $\lambda_{\text{intr}}$ , eV | $S_{\text{eff}}$ | $k_x$ , $s^{-1}$  | $\tau$ , ns |
|--------------------------------------------------|-------------------|----------------------|------------------------------|------------------------------|------------------|-------------------|-------------|
| <b>[10]MCP<math>\supset</math>C<sub>60</sub></b> |                   |                      |                              |                              |                  |                   |             |
| 1400                                             | -0.370            | $2.87 \cdot 10^{-4}$ | 0.128                        | 0.215                        | 1.239            | $1.36 \cdot 10^9$ | 0.74        |
| 1500                                             |                   |                      |                              |                              | 1.156            | $1.35 \cdot 10^9$ | 0.74        |
| 1600                                             |                   |                      |                              |                              | 1.084            | $1.37 \cdot 10^9$ | 0.73        |
| 1700                                             |                   |                      |                              |                              | 1.020            | $1.40 \cdot 10^9$ | 0.71        |
| 1800                                             |                   |                      |                              |                              | 0.963            | $1.43 \cdot 10^9$ | 0.70        |
| <b>[10]NCP<math>\supset</math>C<sub>60</sub></b> |                   |                      |                              |                              |                  |                   |             |
| 1400                                             | -0.344            | $3.14 \cdot 10^{-4}$ | 0.143                        | 0.220                        | 1.267            | $1.80 \cdot 10^9$ | 0.56        |
| 1500                                             |                   |                      |                              |                              | 1.183            | $1.78 \cdot 10^9$ | 0.56        |
| 1600                                             |                   |                      |                              |                              | 1.109            | $1.76 \cdot 10^9$ | 0.57        |
| 1700                                             |                   |                      |                              |                              | 1.044            | $1.73 \cdot 10^9$ | 0.58        |
| 1800                                             |                   |                      |                              |                              | 0.986            | $1.68 \cdot 10^9$ | 0.60        |

## Cartesian coordinates

### [10]CPP

Gas-phase. B3LYP-D3(BJ)/def2-SVP

| Atom | X            | Y            | Z            |
|------|--------------|--------------|--------------|
| 6    | -0.768804000 | 7.207530000  | 1.080658000  |
| 6    | 2.064207000  | 6.233073000  | 1.220951000  |
| 6    | 6.619252000  | 2.958236000  | 1.081159000  |
| 6    | 6.568762000  | -0.036753000 | 1.220953000  |
| 6    | 4.859550000  | -5.379852000 | 1.081205000  |
| 6    | 1.994819000  | -6.255907000 | 1.220960000  |
| 6    | -3.615434000 | -6.282622000 | 1.080610000  |
| 6    | -5.336215000 | -3.830517000 | 1.220766000  |
| 6    | -7.095029000 | 1.496844000  | 1.080559000  |
| 6    | -5.293286000 | 3.890428000  | 1.220830000  |
| 6    | -4.048477000 | 5.626472000  | 0.044031000  |
| 6    | -2.760773000 | 6.357245000  | -0.044675000 |
| 6    | -1.994819000 | 6.255907000  | -1.220960000 |
| 6    | 0.032452000  | 6.929668000  | -0.044327000 |
| 6    | 1.503824000  | 6.764586000  | 0.044499000  |
| 6    | 3.615434000  | 6.282622000  | -1.080610000 |
| 6    | 4.100731000  | 5.587411000  | 0.044555000  |
| 6    | 5.194541000  | 4.589498000  | -0.044138000 |
| 6    | 5.336215000  | 3.830517000  | -1.220766000 |
| 6    | 6.603691000  | 2.110788000  | -0.044199000 |
| 6    | 6.901402000  | 0.660415000  | 0.044541000  |
| 6    | 7.095029000  | -1.496844000 | -1.080559000 |
| 6    | 6.583306000  | -2.173077000 | 0.044470000  |
| 6    | 5.971611000  | -3.521423000 | -0.044248000 |
| 6    | 5.293286000  | -3.890428000 | -1.220830000 |
| 6    | 4.048477000  | -5.626472000 | -0.044031000 |
| 6    | 2.760773000  | -6.357245000 | 0.044675000  |
| 6    | 0.768804000  | -7.207530000 | -1.080658000 |
| 6    | -0.032452000 | -6.929668000 | 0.044327000  |
| 6    | -1.503824000 | -6.764586000 | -0.044499000 |
| 6    | -2.064207000 | -6.233073000 | -1.220951000 |
| 6    | -4.100731000 | -5.587411000 | -0.044555000 |
| 6    | -5.194541000 | -4.589498000 | 0.044138000  |
| 6    | -6.619252000 | -2.958236000 | -1.081159000 |
| 6    | -6.603691000 | -2.110788000 | 0.044199000  |
| 6    | -6.901402000 | -0.660415000 | -0.044541000 |
| 6    | -6.568762000 | 0.036753000  | -1.220953000 |
| 6    | -6.413542000 | 1.419523000  | -1.220908000 |
| 1    | -6.025595000 | 1.903512000  | -2.119000000 |
| 6    | -7.250477000 | 0.112448000  | 1.080507000  |
| 1    | -7.591840000 | -0.384198000 | 1.991572000  |
| 6    | -5.799149000 | 4.351342000  | -1.081091000 |
| 1    | -6.366783000 | 4.149882000  | -1.992360000 |
| 6    | -4.354792000 | 4.917758000  | 1.220723000  |
| 1    | -3.756886000 | 5.081708000  | 2.119039000  |
| 6    | -5.930741000 | -4.169293000 | -1.081178000 |
| 1    | -5.914191000 | -4.771371000 | -1.992460000 |

### [10]ECPP

Gas-phase. B3LYP-D3(BJ)/def2-SVP

| Atom | X            | Y            | Z            |
|------|--------------|--------------|--------------|
| 6    | -0.658940000 | 6.867081000  | 1.201505000  |
| 6    | 2.164162000  | 6.550387000  | 1.201461000  |
| 6    | 6.329213000  | 2.749134000  | 1.201377000  |
| 6    | 6.900264000  | -0.033661000 | 1.201487000  |
| 6    | 4.570462000  | -5.169118000 | 1.201536000  |
| 6    | 2.100117000  | -6.571879000 | 1.201422000  |
| 6    | -3.503998000 | -5.943095000 | 1.201483000  |
| 6    | -5.602457000 | -4.028188000 | 1.201540000  |
| 6    | -6.736299000 | 1.495725000  | 1.201324000  |
| 6    | -5.562457000 | 4.082658000  | 1.201315000  |
| 6    | -4.028960000 | 5.609968000  | 0.050412000  |
| 6    | -2.756175000 | 6.332620000  | 0.050481000  |
| 6    | -2.100117000 | 6.571879000  | -1.201422000 |
| 6    | 0.038289000  | 6.905712000  | -0.050427000 |
| 6    | 1.492777000  | 6.742544000  | -0.050448000 |
| 6    | 3.503998000  | 5.943095000  | -1.201483000 |
| 6    | 4.090840000  | 5.564572000  | 0.050409000  |
| 6    | 5.172055000  | 4.578094000  | 0.050374000  |
| 6    | 5.602457000  | 4.028188000  | -1.201540000 |
| 6    | 6.581251000  | 2.097885000  | -0.050531000 |
| 6    | 6.875539000  | 0.664151000  | -0.050468000 |
| 6    | 6.736299000  | -1.495725000 | -1.201324000 |
| 6    | 6.557226000  | -2.170666000 | 0.050617000  |
| 6    | 5.952498000  | -3.503499000 | 0.050625000  |
| 6    | 5.562457000  | -4.082658000 | -1.201315000 |
| 6    | 4.028960000  | -5.609968000 | -0.050412000 |
| 6    | 2.756175000  | -6.332620000 | -0.050481000 |
| 6    | 0.658940000  | -6.867081000 | -1.201505000 |
| 6    | -0.038289000 | -6.905712000 | 0.050427000  |
| 6    | -1.492777000 | -6.742544000 | 0.050448000  |
| 6    | -2.164162000 | -6.550387000 | -1.201461000 |
| 6    | -4.090840000 | -5.564572000 | -0.050409000 |
| 6    | -5.172055000 | -4.578094000 | -0.050374000 |
| 6    | -6.329213000 | -2.749134000 | -1.201377000 |
| 6    | -6.581251000 | -2.097885000 | 0.050531000  |
| 6    | -6.875539000 | -0.664151000 | 0.050468000  |
| 6    | -6.900264000 | 0.033661000  | -1.201487000 |
| 6    | 6.622255000  | 2.052933000  | 2.431274000  |
| 1    | 6.540177000  | 2.603821000  | 3.371681000  |
| 6    | 6.895384000  | 0.721771000  | 2.431328000  |
| 1    | 7.036854000  | 0.183154000  | 3.371786000  |
| 6    | 3.998784000  | -5.663071000 | 2.431349000  |
| 1    | 4.497325000  | -5.414968000 | 3.371821000  |
| 6    | 2.817098000  | -6.334073000 | 2.431286000  |
| 1    | 2.348532000  | -6.635138000 | 3.371704000  |
| 6    | -4.150429000 | -5.552259000 | 2.431360000  |
| 1    | -3.760083000 | -5.949511000 | 3.371789000  |

|   |              |              |              |   |              |              |              |
|---|--------------|--------------|--------------|---|--------------|--------------|--------------|
| 6 | -6.023943000 | -2.620896000 | 1.220803000  | 6 | -5.154234000 | -4.636301000 | 2.431391000  |
| 1 | -5.995465000 | -2.001518000 | 2.119090000  | 1 | -5.585434000 | -4.283890000 | 3.371847000  |
| 6 | -2.346601000 | -6.857761000 | 1.080627000  | 6 | -6.564061000 | 2.231249000  | 2.431184000  |
| 1 | -1.979648000 | -7.335578000 | 1.991801000  | 1 | -6.821460000 | 1.737393000  | 3.371628000  |
| 6 | -3.331567000 | -5.658638000 | -1.220981000 | 6 | -6.002521000 | 3.468689000  | 2.431172000  |
| 1 | -3.672317000 | -5.140327000 | -2.119084000 | 1 | -5.800324000 | 3.987615000  | 3.371605000  |
| 6 | 0.631717000  | -6.535302000 | 1.220778000  | 6 | 0.093780000  | 6.930291000  | 2.431388000  |
| 1 | 0.051265000  | -6.315775000 | 2.118683000  | 1 | -0.455482000 | 7.022185000  | 3.371839000  |
| 6 | 2.133558000  | -6.927876000 | -1.080449000 | 6 | 1.444198000  | 6.778789000  | 2.431367000  |
| 1 | 2.711467000  | -7.099190000 | -1.991435000 | 1 | 2.000195000  | 6.746693000  | 3.371803000  |
| 6 | 4.354792000  | -4.917758000 | -1.220723000 | 6 | 5.154234000  | 4.636301000  | -2.431391000 |
| 1 | 3.756886000  | -5.081708000 | -2.119039000 | 1 | 5.585434000  | 4.283890000  | -3.371847000 |
| 6 | 5.799149000  | -4.351342000 | 1.081091000  | 6 | 4.150429000  | 5.552259000  | -2.431360000 |
| 1 | 6.366783000  | -4.149882000 | 1.992360000  | 1 | 3.760083000  | 5.949511000  | -3.371789000 |
| 6 | 6.413542000  | -1.419523000 | 1.220908000  | 6 | -2.817098000 | 6.334073000  | -2.431286000 |
| 1 | 6.025595000  | -1.903512000 | 2.119000000  | 1 | -2.348532000 | 6.635138000  | -3.371704000 |
| 6 | 7.250477000  | -0.112448000 | -1.080507000 | 6 | -3.998784000 | 5.663071000  | -2.431349000 |
| 1 | 7.591840000  | 0.384198000  | -1.991572000 | 1 | -4.497325000 | 5.414968000  | -3.371821000 |
| 6 | 6.023943000  | 2.620896000  | -1.220803000 | 6 | -6.895384000 | -0.721771000 | -2.431328000 |
| 1 | 5.995465000  | 2.001518000  | -2.119090000 | 1 | -7.036854000 | -0.183154000 | -3.371786000 |
| 6 | 5.930741000  | 4.169293000  | 1.081178000  | 6 | -6.622255000 | -2.052933000 | -2.431274000 |
| 1 | 5.914191000  | 4.771371000  | 1.992460000  | 1 | -6.540177000 | -2.603821000 | -3.371681000 |
| 6 | 3.331567000  | 5.658638000  | 1.220981000  | 6 | -1.444198000 | -6.778789000 | -2.431367000 |
| 1 | 3.672317000  | 5.140327000  | 2.119084000  | 1 | -2.000195000 | -6.746693000 | -3.371803000 |
| 6 | 2.346601000  | 6.857761000  | -1.080627000 | 6 | -0.093780000 | -6.930291000 | -2.431388000 |
| 1 | 1.979648000  | 7.335578000  | -1.991801000 | 1 | 0.455482000  | -7.022185000 | -3.371839000 |
| 6 | -0.631717000 | 6.535302000  | -1.220778000 | 6 | 6.002521000  | -3.468689000 | -2.431172000 |
| 6 | -6.583306000 | 2.173077000  | -0.044470000 | 6 | -6.767617000 | 1.429614000  | -1.220371000 |
| 6 | -5.971611000 | 3.521423000  | 0.044248000  | 1 | -6.699777000 | 1.915214000  | -2.195018000 |
| 6 | -4.859550000 | 5.379852000  | -1.081205000 | 6 | -6.916569000 | 0.105121000  | 1.220200000  |
| 1 | -0.051265000 | 6.315775000  | -2.118683000 | 1 | -6.958304000 | -0.383436000 | 2.194833000  |
| 6 | -2.133558000 | 6.927876000  | 1.080449000  | 6 | -5.533543000 | 4.149917000  | -1.220395000 |
| 1 | -2.711467000 | 7.099190000  | 1.991435000  | 1 | -5.854440000 | 3.779082000  | -2.195003000 |
| 1 | -7.317780000 | 2.056557000  | 1.991769000  | 6 | -4.634787000 | 5.134185000  | 1.220167000  |
| 1 | -6.297818000 | -0.520943000 | -2.119215000 | 1 | -4.294590000 | 5.487343000  | 2.194790000  |
| 1 | -5.402494000 | 3.280421000  | 2.119322000  | 6 | -5.657480000 | -3.980008000 | -1.220164000 |
| 1 | -4.710354000 | 5.963237000  | -1.992575000 | 1 | -5.403888000 | -4.399778000 | -2.194760000 |
| 1 | -0.305463000 | 7.592247000  | 1.991966000  | 6 | -6.315966000 | -2.821023000 | 1.220329000  |
| 1 | -2.441468000 | 5.825864000  | -2.119227000 | 1 | -6.546798000 | -2.388341000 | 2.194934000  |
| 1 | 1.449921000  | 6.147649000  | 2.119110000  | 6 | -2.237001000 | -6.543924000 | 1.220256000  |
| 1 | 4.216500000  | 6.321597000  | -1.991863000 | 1 | -1.785099000 | -6.734472000 | 2.194840000  |
| 1 | 7.127941000  | 2.636315000  | 1.992630000  | 6 | -3.450990000 | -5.993308000 | -1.220225000 |
| 1 | 4.789550000  | 4.122595000  | -2.119192000 | 1 | -3.892030000 | -5.778782000 | -2.194805000 |
| 1 | 6.297818000  | 0.520943000  | 2.119215000  | 6 | 0.731488000  | -6.877093000 | 1.220207000  |
| 1 | 7.317780000  | -2.056557000 | -1.991769000 | 1 | 0.248674000  | -6.962950000 | 2.194822000  |
| 1 | 5.402494000  | -3.280421000 | -2.119322000 | 6 | 2.037215000  | -6.608910000 | -1.220290000 |
| 1 | 4.710354000  | -5.963237000 | 1.992575000  | 1 | 2.514797000  | -6.497405000 | -2.194884000 |
| 1 | 0.305463000  | -7.592247000 | -1.991966000 | 6 | 4.634787000  | -5.134185000 | -1.220167000 |
| 1 | 2.441468000  | -5.825864000 | 2.119227000  | 1 | 4.294590000  | -5.487343000 | -2.194790000 |
| 1 | -4.216500000 | -6.321597000 | 1.991863000  | 6 | 5.533543000  | -4.149917000 | 1.220395000  |
| 1 | -1.449921000 | -6.147649000 | -2.119110000 | 1 | 5.854440000  | -3.779082000 | 2.195003000  |
| 1 | -4.789550000 | -4.122595000 | 2.119192000  | 6 | 6.767617000  | -1.429614000 | 1.220371000  |
| 1 | -7.127941000 | -2.636315000 | -1.992630000 | 1 | 6.699777000  | -1.915214000 | 2.195018000  |

|   |              |              |              |
|---|--------------|--------------|--------------|
| 6 | 6.916569000  | -0.105121000 | -1.220200000 |
| 1 | 6.958304000  | 0.383436000  | -2.194833000 |
| 6 | 6.315966000  | 2.821023000  | -1.220329000 |
| 1 | 6.546798000  | 2.388341000  | -2.194934000 |
| 6 | 5.657480000  | 3.980008000  | 1.220164000  |
| 1 | 5.403888000  | 4.399778000  | 2.194760000  |
| 6 | 3.450990000  | 5.993308000  | 1.220225000  |
| 1 | 3.892030000  | 5.778782000  | 2.194805000  |
| 6 | 2.237001000  | 6.543924000  | -1.220256000 |
| 1 | 1.785099000  | 6.734472000  | -2.194840000 |
| 6 | -0.731488000 | 6.877093000  | -1.220207000 |
| 6 | -6.557226000 | 2.170666000  | -0.050617000 |
| 6 | -5.952498000 | 3.503499000  | -0.050625000 |
| 6 | -4.570462000 | 5.169118000  | -1.201536000 |
| 1 | 5.800324000  | -3.987615000 | -3.371605000 |
| 6 | 6.564061000  | -2.231249000 | -2.431184000 |
| 1 | 6.821460000  | -1.737393000 | -3.371628000 |
| 1 | -0.248674000 | 6.962950000  | -2.194822000 |
| 6 | -2.037215000 | 6.608910000  | 1.220290000  |
| 1 | -2.514797000 | 6.497405000  | 2.194884000  |

### [10]MCP

Gas-phase. B3LYP-D3(BJ)/def2-SVP

| Atom | X            | Y            | Z            |
|------|--------------|--------------|--------------|
| 6    | 6.476587000  | 1.646089000  | 1.054910000  |
| 6    | 6.644821000  | -0.710331000 | 1.054841000  |
| 6    | 3.566937000  | -5.649878000 | 1.054919000  |
| 6    | 1.377595000  | -6.537503000 | 1.055009000  |
| 6    | -4.271744000 | -5.137916000 | 1.054988000  |
| 6    | -5.793022000 | -3.330509000 | 1.054939000  |
| 6    | -6.207379000 | 2.474718000  | 1.054930000  |
| 6    | -4.957963000 | 4.479680000  | 1.054906000  |
| 6    | 0.435610000  | 6.667123000  | 1.054960000  |
| 6    | 2.728734000  | 6.099043000  | 1.055013000  |
| 6    | 4.626743000  | 4.852735000  | 0.288454000  |
| 6    | 5.572507000  | 3.729004000  | 0.288444000  |
| 6    | 5.792995000  | 3.330563000  | -1.054887000 |
| 6    | 6.596057000  | 1.206683000  | -0.288423000 |
| 6    | 6.700623000  | -0.258325000 | -0.288469000 |
| 6    | 6.207337000  | -2.474696000 | -1.055051000 |
| 6    | 6.045848000  | -2.900531000 | 0.288267000  |
| 6    | 5.269000000  | -4.147025000 | 0.288276000  |
| 6    | 4.957954000  | -4.479738000 | -1.055026000 |
| 6    | 3.185800000  | -5.899249000 | -0.288384000 |
| 6    | 1.824701000  | -6.451166000 | -0.288319000 |
| 6    | -0.435630000 | -6.667201000 | -1.054853000 |
| 6    | -0.890488000 | -6.644927000 | 0.288474000  |
| 6    | -2.316117000 | -6.291707000 | 0.288457000  |
| 6    | -2.728747000 | -6.099051000 | -1.054882000 |
| 6    | -4.626757000 | -4.852721000 | -0.288348000 |
| 6    | -5.572530000 | -3.729002000 | -0.288379000 |
| 6    | -6.476619000 | -1.646119000 | -1.054922000 |

### [10]CPP=C<sub>60</sub>

Gas-phase. B3LYP-D3(BJ)/def2-SVP

| Atom | X            | Y           | Z            |
|------|--------------|-------------|--------------|
| 6    | -0.873172000 | 7.052805000 | -1.187295000 |
| 6    | 0.517687000  | 7.085805000 | -1.180681000 |
| 6    | 1.250407000  | 6.769794000 | -0.018723000 |
| 6    | 0.518963000  | 6.613570000 | 1.172789000  |
| 6    | -0.872085000 | 6.577335000 | 1.165594000  |
| 6    | -1.600554000 | 6.700142000 | -0.032667000 |
| 1    | -1.402536000 | 7.249337000 | -2.121979000 |
| 1    | 1.045856000  | 7.305508000 | -2.110766000 |
| 1    | 1.040491000  | 6.372666000 | 2.100279000  |
| 1    | -1.389288000 | 6.311217000 | 2.088264000  |
| 6    | 2.667452000  | 6.341165000 | -0.074313000 |
| 6    | 3.155934000  | 5.720850000 | -1.239463000 |
| 6    | 3.485828000  | 6.288700000 | 1.071399000  |
| 6    | 4.310276000  | 4.946685000 | -1.213487000 |
| 1    | 2.558774000  | 5.734722000 | -2.151938000 |
| 6    | 4.646215000  | 5.519047000 | 1.095992000  |
| 1    | 3.180688000  | 6.817539000 | 1.976635000  |
| 6    | 5.039379000  | 4.761186000 | -0.024039000 |
| 1    | 4.572848000  | 4.370412000 | -2.101723000 |
| 1    | 5.226938000  | 5.461083000 | 2.019264000  |
| 6    | -2.991209000 | 6.194888000 | -0.103132000 |
| 6    | -3.805609000 | 6.069790000 | 1.040229000  |
| 6    | -3.440190000 | 5.563722000 | -1.278560000 |
| 6    | -4.907021000 | 5.218853000 | 1.052656000  |
| 1    | -3.539534000 | 6.604648000 | 1.954200000  |
| 6    | -4.538053000 | 4.709452000 | -1.265779000 |
| 1    | -2.845385000 | 5.629218000 | -2.190290000 |
| 1    | -5.482204000 | 5.107001000 | 1.974395000  |
| 1    | -4.756203000 | 4.126025000 | -2.161788000 |
| 6    | 5.972291000  | 3.615370000 | 0.074126000  |

|   |              |              |              |   |              |              |              |
|---|--------------|--------------|--------------|---|--------------|--------------|--------------|
| 6 | -6.596106000 | -1.206669000 | 0.288394000  | 6 | 6.014922000  | 2.861209000  | 1.260756000  |
| 6 | -6.700686000 | 0.258340000  | 0.288387000  | 6 | 6.618451000  | 3.072818000  | -1.055410000 |
| 6 | -6.644802000 | 0.710287000  | -1.054934000 | 6 | 6.502026000  | 1.557540000  | 1.268744000  |
| 6 | -6.045751000 | 2.900464000  | -0.288404000 | 1 | 5.524809000  | 3.241973000  | 2.158396000  |
| 6 | -5.268985000 | 4.146994000  | -0.288411000 | 6 | 7.100283000  | 1.767260000  | -1.048900000 |
| 6 | -3.566875000 | 5.649801000  | -1.055006000 | 1 | 6.687728000  | 3.660365000  | -1.973493000 |
| 6 | -3.185776000 | 5.899160000  | 0.288306000  | 6 | 6.959590000  | 0.945507000  | 0.087597000  |
| 6 | -1.824686000 | 6.451088000  | 0.288333000  | 1 | 6.385014000  | 0.960716000  | 2.174638000  |
| 6 | -1.377528000 | 6.537565000  | -1.054957000 | 1 | 7.536892000  | 1.355499000  | -1.961453000 |
| 6 | -0.023816000 | 6.654677000  | -1.353611000 | 6 | 6.974363000  | -0.533122000 | 0.000914000  |
| 1 | 0.323339000  | 6.617066000  | -2.389535000 | 6 | 6.524829000  | -1.152799000 | -1.180576000 |
| 6 | -0.921017000 | 6.590659000  | 1.353583000  | 6 | 7.143057000  | -1.353438000 | 1.133514000  |
| 1 | -1.259300000 | 6.504131000  | 2.389519000  | 6 | 6.094388000  | -2.475742000 | -1.180665000 |
| 6 | 3.129282000  | 5.873519000  | -1.353547000 | 1 | 6.380148000  | -0.554854000 | -2.081581000 |
| 1 | 2.804714000  | 6.002253000  | -2.389483000 | 6 | 6.716942000  | -2.678524000 | 1.132163000  |
| 6 | 3.892732000  | 5.398068000  | 1.353670000  | 1 | 7.564033000  | -0.930660000 | 2.048274000  |
| 1 | 4.151448000  | 5.163566000  | 2.389598000  | 6 | 6.098536000  | -3.242733000 | -0.001135000 |
| 6 | -4.619777000 | 4.790935000  | -1.353656000 | 1 | 5.619244000  | -2.872773000 | -2.079033000 |
| 1 | -4.842666000 | 4.522195000  | -2.389598000 | 1 | 6.815473000  | -3.270105000 | 2.044993000  |
| 6 | -3.931375000 | 5.369823000  | 1.353538000  | 6 | 5.246330000  | -4.450488000 | 0.083846000  |
| 1 | -3.628356000 | 5.543353000  | 2.389466000  | 6 | 4.534905000  | -4.707176000 | 1.269615000  |
| 6 | -6.554054000 | 1.160932000  | 1.353600000  | 6 | 4.910663000  | -5.221494000 | -1.046747000 |
| 1 | -6.576207000 | 0.812463000  | 2.389534000  | 6 | 3.437896000  | -5.562312000 | 1.281395000  |
| 6 | -6.337670000 | 2.033883000  | -1.353619000 | 1 | 4.750558000  | -4.121777000 | 2.164884000  |
| 1 | -6.194565000 | 2.352362000  | -2.389558000 | 6 | 3.809547000  | -6.073047000 | -1.035512000 |
| 6 | -6.322757000 | -2.079267000 | 1.353609000  | 1 | 5.487825000  | -5.110374000 | -1.967347000 |
| 1 | -6.394227000 | -1.737497000 | 2.389544000  | 6 | 2.992830000  | -6.196810000 | 0.106193000  |
| 6 | -5.984589000 | -2.912683000 | -1.353607000 | 1 | 2.840698000  | -5.626607000 | 2.191641000  |
| 1 | -5.797791000 | -3.207636000 | -2.389556000 | 1 | 3.545562000  | -6.609000000 | -1.949456000 |
| 6 | -3.892748000 | -5.398085000 | -1.353549000 | 6 | 1.602420000  | -6.702778000 | 0.034237000  |
| 1 | -4.151490000 | -5.163646000 | -2.389485000 | 6 | 0.874910000  | -6.580115000 | -1.164598000 |
| 6 | -3.129226000 | -5.873357000 | 1.353675000  | 6 | 0.874260000  | -7.055168000 | 1.188449000  |
| 1 | -2.804625000 | -6.002022000 | 2.389611000  | 6 | -0.516223000 | -6.614504000 | -1.172440000 |
| 6 | 0.023877000  | -6.654483000 | 1.353701000  | 1 | 1.393244000  | -6.314993000 | -2.086932000 |
| 1 | -0.323245000 | -6.616789000 | 2.389636000  | 6 | -0.516590000 | -7.087225000 | 1.181019000  |
| 6 | 0.920990000  | -6.590792000 | -1.353525000 | 1 | 1.403138000  | -7.252042000 | 2.123344000  |
| 1 | 1.259241000  | -6.504349000 | -2.389475000 | 6 | -1.248306000 | -6.769851000 | 0.018800000  |
| 6 | 3.931322000  | -5.369860000 | -1.353636000 | 1 | -1.037155000 | -6.372715000 | -2.100062000 |
| 1 | 3.628251000  | -5.543358000 | -2.389552000 | 1 | -1.045574000 | -7.306967000 | 2.110636000  |
| 6 | 4.619811000  | -4.790955000 | 1.353543000  | 6 | -2.664598000 | -6.338812000 | 0.074653000  |
| 1 | 4.842760000  | -4.522238000 | 2.389479000  | 6 | -3.151092000 | -5.717293000 | 1.240012000  |
| 6 | 6.337765000  | -2.033955000 | 1.353493000  | 6 | -3.484164000 | -6.286062000 | -1.070169000 |
| 1 | 6.194692000  | -2.352466000 | 2.389426000  | 6 | -4.305310000 | -4.943006000 | 1.215221000  |
| 6 | 6.553939000  | -1.160876000 | -1.353706000 | 1 | -2.552758000 | -5.731113000 | 2.151708000  |
| 1 | 6.576029000  | -0.812375000 | -2.389630000 | 6 | -4.644838000 | -5.516681000 | -1.093380000 |
| 6 | 6.322707000  | 2.079319000  | -1.353602000 | 1 | -3.180139000 | -6.815172000 | -1.975636000 |
| 6 | 0.890513000  | 6.645019000  | -0.288356000 | 6 | -5.036870000 | -4.758807000 | 0.027082000  |
| 6 | 2.316144000  | 6.291794000  | -0.288324000 | 1 | -4.566408000 | -4.366218000 | 2.103529000  |
| 6 | 4.271765000  | 5.138013000  | -1.054874000 | 1 | -5.226956000 | -5.459506000 | -2.015818000 |
| 1 | 6.394154000  | 1.737584000  | -2.389551000 | 6 | -5.971986000 | -3.614548000 | -0.069090000 |
| 6 | 5.984578000  | 2.912648000  | 1.353642000  | 6 | -6.020671000 | -2.861245000 | -1.256030000 |
| 1 | 5.797786000  | 3.207572000  | 2.389600000  | 6 | -6.614985000 | -3.072511000 | 1.062515000  |
| 6 | -2.525464000 | 6.225205000  | -1.994345000 | 6 | -6.509323000 | -1.558085000 | -1.262623000 |
|   |              |              |              | 1 | -5.534177000 | -3.241975000 | -2.155639000 |
|   |              |              |              | 6 | -7.097875000 | -1.767356000 | 1.057494000  |
|   |              |              |              | 1 | -6.680368000 | -3.659855000 | 1.980995000  |

|   |              |              |              |   |              |              |              |
|---|--------------|--------------|--------------|---|--------------|--------------|--------------|
| 6 | -5.703127000 | 3.552276000  | 1.994245000  | 6 | -6.961888000 | -0.945822000 | -0.079707000 |
| 6 | -6.702573000 | -0.478054000 | -1.994254000 | 1 | -6.396877000 | -0.961527000 | -2.169293000 |
| 6 | -5.140966000 | -4.325589000 | 1.994299000  | 1 | -7.531146000 | -1.355695000 | 1.971678000  |
| 6 | -1.616335000 | -6.520997000 | -1.994189000 | 6 | -6.975096000 | 0.532829000  | 0.007389000  |
| 6 | 2.525627000  | -6.225198000 | 1.994315000  | 6 | -6.518227000 | 1.150832000  | 1.186939000  |
| 6 | 5.703044000  | -3.552280000 | -1.994365000 | 6 | -7.148720000 | 1.354291000  | -1.123624000 |
| 6 | 6.702515000  | 0.477973000  | 1.994200000  | 6 | -6.087333000 | 2.473541000  | 1.186308000  |
| 6 | 5.140965000  | 4.325690000  | -1.994210000 | 1 | -6.368568000 | 0.551735000  | 2.086347000  |
| 6 | 1.616294000  | 6.520924000  | 1.994318000  | 6 | -6.721250000 | 2.679066000  | -1.123298000 |
| 1 | -2.895962000 | 7.139226000  | -2.495138000 | 1 | -7.574785000 | 0.932711000  | -2.036604000 |
| 1 | -2.239503000 | 5.520023000  | -2.791182000 | 6 | -6.097375000 | 3.241853000  | 0.007675000  |
| 1 | 1.853507000  | 7.478388000  | 2.494820000  | 1 | -5.607089000 | 2.869103000  | 2.082582000  |
| 1 | 1.433317000  | 5.782511000  | 2.791361000  | 1 | -6.823592000 | 3.271624000  | -2.035092000 |
| 1 | 5.895609000  | 4.960856000  | -2.494802000 | 6 | -5.245758000 | 4.449857000  | -0.078550000 |
| 1 | 4.558875000  | 3.835775000  | -2.791177000 | 6 | -1.710100000 | 2.662110000  | -1.629062000 |
| 1 | 7.686487000  | 0.548203000  | 2.494571000  | 6 | -2.644429000 | 1.560179000  | -1.812531000 |
| 1 | 5.943783000  | 0.423814000  | 2.791316000  | 6 | -0.490856000 | 2.671349000  | -2.312364000 |
| 1 | 6.540102000  | -4.073884000 | -2.495126000 | 6 | -2.317022000 | 0.503314000  | -2.668920000 |
| 1 | 5.057235000  | -3.149767000 | -2.791188000 | 6 | -2.609258000 | -0.870315000 | -2.275875000 |
| 1 | 2.896251000  | -7.139267000 | 2.494941000  | 6 | -3.275730000 | 1.288153000  | -0.526982000 |
| 1 | 2.239779000  | -5.520067000 | 2.791234000  | 6 | -3.554450000 | -0.028105000 | -0.150500000 |
| 1 | -1.853584000 | -7.478509000 | -2.494582000 | 6 | -3.211114000 | -1.128881000 | -1.041222000 |
| 1 | -1.433372000 | -5.782644000 | -2.791287000 | 6 | 0.669652000  | 3.483129000  | -0.285992000 |
| 1 | -4.558892000 | -3.835633000 | 2.791251000  | 6 | -0.602526000 | 3.474909000  | 0.423238000  |
| 1 | -5.895614000 | -4.960770000 | 2.494858000  | 6 | 0.725564000  | 3.091131000  | -1.626033000 |
| 1 | -7.686606000 | -0.548283000 | -2.494513000 | 6 | -1.766601000 | 3.072900000  | -0.232578000 |
| 1 | -5.943902000 | -0.423937000 | -2.791423000 | 6 | -2.735529000 | 2.225673000  | 0.447603000  |
| 1 | -5.057390000 | 3.149878000  | 2.791180000  | 6 | -0.354125000 | 3.044836000  | 1.792946000  |
| 1 | -6.540265000 | 4.073918000  | 2.494836000  | 6 | -1.282782000 | 2.228739000  | 2.447720000  |
|   |              |              |              | 6 | -2.500875000 | 1.812229000  | 1.761969000  |
|   |              |              |              | 6 | 2.812347000  | 1.833746000  | -1.199181000 |
|   |              |              |              | 6 | 2.753427000  | 2.245845000  | 0.197155000  |
|   |              |              |              | 6 | 1.818079000  | 2.247785000  | -2.092079000 |
|   |              |              |              | 6 | 1.705737000  | 3.055474000  | 0.643973000  |
|   |              |              |              | 6 | 1.073116000  | 2.784775000  | 1.930240000  |
|   |              |              |              | 6 | 3.211216000  | 1.129407000  | 1.014076000  |
|   |              |              |              | 6 | 2.609439000  | 0.870774000  | 2.248755000  |
|   |              |              |              | 6 | 1.514529000  | 1.713592000  | 2.714359000  |
|   |              |              |              | 6 | 1.753450000  | -0.007443000 | -3.110193000 |
|   |              |              |              | 6 | 2.791362000  | -0.438453000 | -2.181323000 |
|   |              |              |              | 6 | 1.277353000  | 1.307029000  | -3.065816000 |
|   |              |              |              | 6 | 3.307637000  | 0.463488000  | -1.244751000 |
|   |              |              |              | 6 | 3.554461000  | 0.028565000  | 0.123441000  |
|   |              |              |              | 6 | 2.501083000  | -1.811684000 | -1.789102000 |
|   |              |              |              | 6 | 2.735680000  | -2.225174000 | -0.474706000 |
|   |              |              |              | 6 | 3.275896000  | -1.287707000 | 0.499880000  |
|   |              |              |              | 6 | -1.044163000 | 0.508158000  | -3.377163000 |
|   |              |              |              | 6 | -0.548472000 | -0.861051000 | -3.422609000 |
|   |              |              |              | 6 | -0.149236000 | 1.569924000  | -3.202056000 |
|   |              |              |              | 6 | 0.821613000  | -1.113051000 | -3.290307000 |
|   |              |              |              | 6 | 1.283014000  | -2.228172000 | -2.474908000 |
|   |              |              |              | 6 | -1.514380000 | -1.713084000 | -2.741523000 |
|   |              |              |              | 6 | -1.072884000 | -2.784113000 | -1.957308000 |
|   |              |              |              | 6 | 0.354340000  | -3.044141000 | -1.820057000 |
|   |              |              |              | 6 | 1.710341000  | -2.661782000 | 1.601949000  |
|   |              |              |              | 6 | 1.766911000  | -3.072647000 | 0.205390000  |

|   |              |              |              |
|---|--------------|--------------|--------------|
| 6 | 0.602617000  | -3.474195000 | -0.450353000 |
| 6 | 0.491117000  | -2.670922000 | 2.285275000  |
| 6 | 1.044350000  | -0.507664000 | 3.350006000  |
| 6 | 2.317221000  | -0.502849000 | 2.641696000  |
| 6 | 2.644736000  | -1.559887000 | 1.785485000  |
| 6 | 0.149437000  | -1.569411000 | 3.174875000  |
| 6 | -1.753319000 | 0.007982000  | 3.082959000  |
| 6 | -0.821432000 | 1.113550000  | 3.263078000  |
| 6 | 0.548653000  | 0.861557000  | 3.395442000  |
| 6 | -1.277180000 | -1.306492000 | 3.038580000  |
| 6 | -2.812211000 | -1.833184000 | 1.172024000  |
| 6 | -3.307760000 | -0.463027000 | 1.217699000  |
| 6 | -2.791389000 | 0.439011000  | 2.154246000  |
| 6 | -1.817900000 | -2.247242000 | 2.064861000  |
| 6 | -0.669485000 | -3.482479000 | 0.258904000  |
| 6 | -1.705573000 | -3.054958000 | -0.671067000 |
| 6 | -2.753372000 | -2.245428000 | -0.224306000 |
| 6 | -0.725336000 | -3.090582000 | 1.598891000  |

**[10]ECPD<sub>60</sub>**

Gas-phase. B3LYP-D3(BJ)/def2-SVP

| Atom | X            | Y            | Z            |
|------|--------------|--------------|--------------|
| 6    | -0.653241000 | 6.797229000  | 1.282979000  |
| 6    | 2.154444000  | 6.455063000  | 1.345535000  |
| 6    | 6.299041000  | 2.693383000  | 1.396589000  |
| 6    | 6.842132000  | -0.084194000 | 1.376579000  |
| 6    | 4.493629000  | -5.173091000 | 1.248969000  |
| 6    | 2.028849000  | -6.575919000 | 1.169353000  |
| 6    | -3.545636000 | -5.906533000 | 1.047643000  |
| 6    | -5.644572000 | -3.991540000 | 1.023035000  |
| 6    | -6.740120000 | 1.497054000  | 1.061502000  |
| 6    | -5.523986000 | 4.055705000  | 1.129166000  |
| 6    | -3.985149000 | 5.600886000  | 0.020542000  |
| 6    | -2.717471000 | 6.320608000  | 0.061645000  |
| 6    | -2.028459000 | 6.574731000  | -1.167364000 |
| 6    | 0.073781000  | 6.872038000  | 0.050685000  |
| 6    | 1.523276000  | 6.698905000  | 0.082576000  |
| 6    | 3.546315000  | 5.906734000  | -1.044527000 |
| 6    | 4.101923000  | 5.505298000  | 0.212041000  |
| 6    | 5.183155000  | 4.527195000  | 0.224448000  |
| 6    | 5.645336000  | 3.991874000  | -1.020162000 |
| 6    | 6.600496000  | 2.064176000  | 0.145871000  |
| 6    | 6.881079000  | 0.631750000  | 0.136249000  |
| 6    | 6.739449000  | -1.496948000 | -1.059607000 |
| 6    | 6.524463000  | -2.190417000 | 0.175083000  |
| 6    | 5.906598000  | -3.511139000 | 0.140213000  |
| 6    | 5.522978000  | -4.055469000 | -1.127556000 |
| 6    | 3.984963000  | -5.601439000 | -0.018876000 |
| 6    | 2.717439000  | -6.321403000 | -0.059823000 |
| 6    | 0.652980000  | -6.798266000 | -1.280643000 |
| 6    | -0.073690000 | -6.873152000 | -0.048165000 |
| 6    | -1.523148000 | -6.699712000 | -0.079691000 |
| 6    | -2.154667000 | -6.456449000 | -1.342577000 |
| 6    | -4.101466000 | -5.505474000 | -0.208953000 |
| 6    | -5.182494000 | -4.527159000 | -0.221489000 |

**[10]MCPD<sub>60</sub>**

Gas-phase. B3LYP-D3(BJ)/def2-SVP

| Atom | X            | Y            | Z            |
|------|--------------|--------------|--------------|
| 6    | 6.460461000  | 1.622541000  | 1.277565000  |
| 6    | 6.624119000  | -0.730113000 | 1.267321000  |
| 6    | 3.533256000  | -5.634684000 | 1.129997000  |
| 6    | 1.338560000  | -6.506680000 | 1.060104000  |
| 6    | -4.319477000 | -5.108454000 | 0.904410000  |
| 6    | -5.873900000 | -3.318243000 | 0.858286000  |
| 6    | -6.280125000 | 2.474124000  | 0.880004000  |
| 6    | -4.992910000 | 4.463105000  | 0.941347000  |
| 6    | 0.408359000  | 6.613966000  | 1.109198000  |
| 6    | 2.697826000  | 6.028649000  | 1.176866000  |
| 6    | 4.631702000  | 4.815610000  | 0.450459000  |
| 6    | 5.588630000  | 3.705378000  | 0.478789000  |
| 6    | 5.873768000  | 3.318579000  | -0.854766000 |
| 6    | 6.669978000  | 1.197970000  | -0.060995000 |
| 6    | 6.772093000  | -0.269512000 | -0.067515000 |
| 6    | 6.280042000  | -2.474224000 | -0.876681000 |
| 6    | 6.056695000  | -2.909820000 | 0.454028000  |
| 6    | 5.270573000  | -4.147344000 | 0.415921000  |
| 6    | 4.992891000  | -4.463334000 | -0.937899000 |
| 6    | 3.196903000  | -5.888209000 | -0.224939000 |
| 6    | 1.832013000  | -6.431509000 | -0.268282000 |
| 6    | -0.408570000 | -6.614392000 | -1.105279000 |
| 6    | -0.907233000 | -6.600422000 | 0.223069000  |
| 6    | -2.332680000 | -6.244637000 | 0.181794000  |
| 6    | -2.698024000 | -6.028859000 | -1.172957000 |
| 6    | -4.631686000 | -4.815314000 | -0.446757000 |
| 6    | -5.588649000 | -3.705095000 | -0.475229000 |
| 6    | -6.460911000 | -1.622512000 | -1.274208000 |
| 6    | -6.670489000 | -1.197911000 | 0.064323000  |
| 6    | -6.772571000 | 0.269552000  | 0.070786000  |
| 6    | -6.624688000 | 0.730151000  | -1.264054000 |
| 6    | -6.056765000 | 2.909733000  | -0.450707000 |
| 6    | -5.270575000 | 4.147247000  | -0.412521000 |

|   |              |              |              |   |              |              |              |
|---|--------------|--------------|--------------|---|--------------|--------------|--------------|
| 6 | -6.298494000 | -2.693603000 | -1.393948000 | 6 | -3.533382000 | 5.634850000  | -1.126427000 |
| 6 | -6.600125000 | -2.064249000 | -0.143350000 | 6 | -3.197021000 | 5.888110000  | 0.228546000  |
| 6 | -6.881026000 | -0.631893000 | -0.133964000 | 6 | -1.832147000 | 6.431365000  | 0.272031000  |
| 6 | -6.842449000 | 0.083849000  | -1.374406000 | 6 | -1.338658000 | 6.506950000  | -1.056304000 |
| 6 | 6.524990000  | 1.978283000  | 2.629143000  | 6 | 0.025805000  | 6.612953000  | -1.311513000 |
| 1 | 6.396637000  | 2.515480000  | 3.572269000  | 1 | 0.404964000  | 6.564173000  | -2.335639000 |
| 6 | 6.781697000  | 0.644899000  | 2.619473000  | 6 | -0.958843000 | 6.555275000  | 1.364254000  |
| 1 | 6.868045000  | 0.085443000  | 3.554446000  | 1 | -1.328432000 | 6.462608000  | 2.388930000  |
| 6 | 3.881161000  | -5.661631000 | 2.460706000  | 6 | 3.182744000  | 5.847363000  | -1.223212000 |
| 1 | 4.345752000  | -5.398449000 | 3.414893000  | 1 | 2.886283000  | 5.996639000  | -2.265015000 |
| 6 | 2.703611000  | -6.339259000 | 2.422661000  | 6 | 3.858318000  | 5.334381000  | 1.500882000  |
| 1 | 2.201660000  | -6.642222000 | 3.345551000  | 1 | 4.088698000  | 5.075836000  | 2.538025000  |
| 6 | -4.200496000 | -5.509089000 | 2.270821000  | 6 | -4.585916000 | 4.788229000  | -1.456654000 |
| 1 | -3.817064000 | -5.905705000 | 3.214795000  | 1 | -4.782717000 | 4.518588000  | -2.497564000 |
| 6 | -5.203583000 | -4.591549000 | 2.259032000  | 6 | -3.972774000 | 5.353960000  | 1.270804000  |
| 1 | -5.643922000 | -4.231957000 | 3.193017000  | 1 | -3.692080000 | 5.522866000  | 2.313917000  |
| 6 | -6.558226000 | 2.194109000  | 2.311118000  | 6 | -6.668620000 | 1.163308000  | 1.148503000  |
| 1 | -6.827845000 | 1.677347000  | 3.235974000  | 1 | -6.746508000 | 0.805833000  | 2.178916000  |
| 6 | -5.966456000 | 3.416197000  | 2.343774000  | 6 | -6.290317000 | 2.051360000  | -1.535701000 |
| 1 | -5.737717000 | 3.902750000  | 3.295685000  | 1 | -6.070968000 | 2.370885000  | -2.557882000 |
| 6 | 0.059798000  | 6.798020000  | 2.536031000  | 6 | -6.444620000 | -2.077631000 | 1.135470000  |
| 1 | -0.517544000 | 6.852935000  | 3.462364000  | 1 | -6.575066000 | -1.741214000 | 2.167773000  |
| 6 | 1.407168000  | 6.634182000  | 2.566070000  | 6 | -5.941441000 | -2.881554000 | -1.554722000 |
| 1 | 1.939477000  | 6.554389000  | 3.517196000  | 1 | -5.674899000 | -3.160301000 | -2.577852000 |
| 6 | 5.204584000  | 4.592307000  | -2.256055000 | 6 | -3.858418000 | -5.334463000 | -1.497080000 |
| 1 | 5.645366000  | 4.233223000  | -3.190025000 | 1 | -4.088730000 | -5.076033000 | -2.534267000 |
| 6 | 4.201492000  | 5.509831000  | -2.267721000 | 6 | -3.182698000 | -5.846747000 | 1.227111000  |
| 1 | 3.818266000  | 5.906863000  | -3.211602000 | 1 | -2.886078000 | -5.995618000 | 2.268929000  |
| 6 | -2.702735000 | 6.337591000  | -2.420852000 | 6 | -0.025882000 | -6.612511000 | 1.315420000  |
| 1 | -2.200370000 | 6.640130000  | -3.343652000 | 1 | -0.404989000 | -6.563324000 | 2.339545000  |
| 6 | -3.880278000 | 5.659970000  | -2.459038000 | 6 | 0.958645000  | -6.555883000 | -1.360416000 |
| 1 | -4.344597000 | 5.396484000  | -3.413275000 | 1 | 1.328161000  | -6.463377000 | -2.385134000 |
| 6 | -6.781912000 | -0.645450000 | -2.617173000 | 6 | 3.972711000  | -5.354214000 | -1.267248000 |
| 1 | -6.868590000 | -0.086265000 | -3.552276000 | 1 | 3.691967000  | -5.523145000 | -2.310343000 |
| 6 | -6.524541000 | -1.978714000 | -2.626596000 | 6 | 4.585851000  | -4.788132000 | 1.460125000  |
| 1 | -6.396043000 | -2.515967000 | -3.569671000 | 1 | 4.782805000  | -4.518549000 | 2.501021000  |
| 6 | -1.407787000 | -6.636101000 | -2.563285000 | 6 | 6.289981000  | -2.051364000 | 1.539001000  |
| 1 | -1.940424000 | -6.557027000 | -3.514285000 | 1 | 6.070707000  | -2.370903000 | 2.561194000  |
| 6 | -0.060359000 | -6.799462000 | -2.533528000 | 6 | 6.668383000  | -1.163349000 | -1.145205000 |
| 1 | 0.516784000  | -6.854557000 | -3.459975000 | 1 | 6.746039000  | -0.805864000 | -2.175631000 |
| 6 | 5.964925000  | -3.415566000 | -2.342144000 | 6 | 6.444190000  | 2.077842000  | -1.132053000 |
| 6 | -6.699529000 | 1.475715000  | -1.363536000 | 6 | 0.907118000  | 6.600600000  | -0.219128000 |
| 1 | -6.582464000 | 1.975986000  | -2.325665000 | 6 | 2.332599000  | 6.244859000  | -0.177851000 |
| 6 | -6.947812000 | 0.112656000  | 1.048425000  | 6 | 4.319631000  | 5.109140000  | -0.900642000 |
| 1 | -7.023692000 | -0.393662000 | 2.011505000  | 1 | 6.574363000  | 1.741448000  | -2.164397000 |
| 6 | -5.465509000 | 4.165555000  | -1.294402000 | 6 | 5.941302000  | 2.881679000  | 1.558200000  |
| 1 | -5.778352000 | 3.809096000  | -2.276789000 | 1 | 5.674885000  | 3.160405000  | 2.581372000  |
| 6 | -4.600985000 | 5.106497000  | 1.175531000  | 6 | -2.448984000 | 6.181004000  | -2.034302000 |
| 1 | -4.273047000 | 5.447310000  | 2.158330000  | 6 | -5.763167000 | 3.520572000  | 1.850421000  |
| 6 | -5.627733000 | -3.921403000 | -1.401370000 | 6 | -6.614221000 | -0.447190000 | -2.215893000 |
| 1 | -5.333457000 | -4.327450000 | -2.369731000 | 6 | -5.211608000 | -4.287393000 | 1.820440000  |
| 6 | -6.373576000 | -2.795158000 | 1.029048000  | 6 | -1.552276000 | -6.427734000 | -2.081921000 |
| 1 | -6.640813000 | -2.370297000 | 1.997749000  | 6 | 2.448939000  | -6.180707000 | 2.038003000  |
| 6 | -2.289845000 | -6.527254000 | 1.078845000  | 6 | 5.762988000  | -3.520715000 | -1.847037000 |
| 1 | -1.860510000 | -6.750345000 | 2.056788000  | 6 | 6.613552000  | 0.447165000  | 2.219193000  |
| 6 | -3.434609000 | -5.893643000 | -1.375541000 | 6 | 5.211565000  | 4.287942000  | -1.816761000 |



|   |              |              |              |   |              |              |              |
|---|--------------|--------------|--------------|---|--------------|--------------|--------------|
| 1 | -3.842960000 | -5.633612000 | -2.352741000 | 6 | 1.551943000  | 6.426956000  | 2.085874000  |
| 6 | 0.660623000  | -6.876285000 | 1.143371000  | 1 | -2.789792000 | 7.079342000  | -2.582599000 |
| 1 | 0.149701000  | -6.979024000 | 2.101617000  | 1 | -2.131311000 | 5.444645000  | -2.789800000 |
| 6 | 2.030565000  | -6.555799000 | -1.255480000 | 1 | 1.776928000  | 7.357998000  | 2.638858000  |
| 1 | 2.530430000  | -6.408166000 | -2.213473000 | 1 | 1.330013000  | 5.651751000  | 2.837100000  |
| 6 | 4.600124000  | -5.106371000 | -1.173927000 | 1 | 5.949281000  | 4.915888000  | -2.349803000 |
| 1 | 4.271736000  | -5.446785000 | -2.156711000 | 1 | 4.627159000  | 3.755882000  | -2.586019000 |
| 6 | 5.465273000  | -4.166025000 | 1.295980000  | 1 | 7.552888000  | 0.509420000  | 2.799872000  |
| 1 | 5.778547000  | -3.810113000 | 2.278435000  | 1 | 5.787753000  | 0.384831000  | 2.946531000  |
| 6 | 6.698896000  | -1.476017000 | 1.365447000  | 1 | 6.584423000  | -4.041312000 | -2.373887000 |
| 1 | 6.581853000  | -1.976523000 | 2.327455000  | 1 | 5.119124000  | -3.072063000 | -2.621439000 |
| 6 | 6.947657000  | -0.112620000 | -1.046246000 | 1 | 2.789773000  | -7.079068000 | 2.586253000  |
| 1 | 7.023476000  | 0.393857000  | -2.009250000 | 1 | 2.131409000  | -5.444331000 | 2.793543000  |
| 6 | 6.374159000  | 2.795379000  | -1.026394000 | 1 | -1.777445000 | -7.359050000 | -2.634368000 |
| 1 | 6.641483000  | 2.370733000  | -1.995166000 | 1 | -1.330346000 | -5.652968000 | -2.833586000 |
| 6 | 5.628457000  | 3.921279000  | 1.404224000  | 1 | -4.627330000 | -3.755136000 | 2.589644000  |
| 1 | 5.334541000  | 4.327390000  | 2.372673000  | 1 | -5.949328000 | -4.915523000 | 2.353243000  |
| 6 | 3.434537000  | 5.892603000  | 1.378622000  | 1 | -7.553646000 | -0.509558000 | -2.796413000 |
| 1 | 3.842663000  | 5.632200000  | 2.355817000  | 1 | -5.788545000 | -0.384854000 | -2.943362000 |
| 6 | 2.290386000  | 6.527166000  | -1.075786000 | 1 | -5.119472000 | 3.072002000  | 2.625003000  |
| 1 | 1.861302000  | 6.750629000  | -2.053757000 | 1 | -6.584742000 | 4.041281000  | 2.376949000  |
| 6 | -0.660216000 | 6.875032000  | -1.141035000 | 6 | 0.495485000  | -3.151356000 | 1.570713000  |
| 6 | -6.525098000 | 2.190324000  | -0.173304000 | 6 | -0.954408000 | -3.014877000 | 1.629683000  |
| 6 | -5.907286000 | 3.511082000  | -0.138575000 | 6 | 1.312077000  | -2.328398000 | 2.354292000  |
| 6 | -4.493410000 | 5.172165000  | -1.247343000 | 6 | -1.531912000 | -2.055826000 | 2.468012000  |
| 1 | 5.735623000  | -3.901770000 | -3.294098000 | 6 | -2.663566000 | -1.264580000 | 1.998541000  |
| 6 | 6.556907000  | -2.193582000 | -2.309348000 | 6 | -1.478431000 | -3.214365000 | 0.284657000  |
| 1 | 6.826131000  | -1.676545000 | -3.234164000 | 6 | -2.560768000 | -2.457894000 | -0.166054000 |
| 1 | -0.149021000 | 6.977338000  | -2.099177000 | 6 | -3.162273000 | -1.459754000 | 0.706457000  |
| 6 | -2.030869000 | 6.555028000  | 1.257471000  | 6 | 2.874021000  | -2.035035000 | 0.461393000  |
| 1 | -2.531066000 | 6.407600000  | 2.215317000  | 6 | 2.025882000  | -2.894144000 | -0.351182000 |
| 6 | 0.583206000  | -3.035981000 | 1.762285000  | 6 | 2.528940000  | -1.759260000 | 1.787055000  |
| 6 | -0.872388000 | -2.948260000 | 1.791671000  | 6 | 0.862241000  | -3.439732000 | 0.190899000  |
| 6 | 1.355759000  | -2.134751000 | 2.504215000  | 6 | -0.357529000 | -3.482091000 | -0.602491000 |
| 6 | -1.498352000 | -1.960538000 | 2.560234000  | 6 | 2.024024000  | -2.374105000 | -1.711910000 |
| 6 | -2.650247000 | -1.240596000 | 2.029173000  | 6 | 0.852581000  | -2.417234000 | -2.475827000 |
| 6 | -1.369402000 | -3.252911000 | 0.455771000  | 6 | -0.364027000 | -2.986609000 | -1.909706000 |
| 6 | -2.472707000 | -2.561606000 | -0.054002000 | 6 | 3.173127000  | 0.609513000  | 1.486161000  |
| 6 | -3.126704000 | -1.534118000 | 0.747354000  | 6 | 3.539125000  | 0.316177000  | 0.107006000  |
| 6 | 2.946883000  | -1.901817000 | 0.625199000  | 6 | 2.678907000  | -0.407246000 | 2.309832000  |
| 6 | 2.141516000  | -2.840495000 | -0.146964000 | 6 | 3.392606000  | -0.978698000 | -0.393908000 |
| 6 | 2.562818000  | -1.555878000 | 1.924303000  | 6 | 2.869709000  | -1.187555000 | -1.738555000 |
| 6 | 0.985265000  | -3.397109000 | 0.408732000  | 6 | 3.162529000  | 1.459609000  | -0.713022000 |
| 6 | -0.221958000 | -3.534756000 | -0.398074000 | 6 | 2.663901000  | 1.264536000  | -2.005143000 |
| 6 | 2.140722000  | -2.396579000 | -1.534827000 | 6 | 2.510107000  | -0.088716000 | -2.526238000 |
| 6 | 0.981588000  | -2.526314000 | -2.308442000 | 6 | 0.973534000  | 1.133420000  | 3.229454000  |
| 6 | -0.223547000 | -3.108733000 | -1.729681000 | 6 | 1.493324000  | 2.193578000  | 2.373757000  |
| 6 | 3.130046000  | 0.816435000  | 1.493957000  | 6 | 1.554950000  | -0.139477000 | 3.199830000  |
| 6 | 3.532923000  | 0.454659000  | 0.140298000  | 6 | 2.569016000  | 1.934451000  | 1.518693000  |
| 6 | 2.654717000  | -0.168771000 | 2.366011000  | 6 | 2.561055000  | 2.457762000  | 0.159495000  |
| 6 | 3.442494000  | -0.875542000 | -0.284322000 | 6 | 0.364382000  | 2.986553000  | 1.903108000  |
| 6 | 2.944505000  | -1.182290000 | -1.620088000 | 6 | 0.357916000  | 3.482182000  | 0.595937000  |
| 6 | 3.126638000  | 1.534981000  | -0.751972000 | 6 | 1.478759000  | 3.214253000  | -0.291223000 |
| 6 | 2.650240000  | 1.241496000  | -2.033809000 | 6 | -0.682592000 | -1.193204000 | 3.280253000  |
| 6 | 2.555031000  | -0.145403000 | -2.474873000 | 6 | -1.286939000 | 0.131139000  | 3.311333000  |
| 6 | 0.877807000  | 1.358563000  | 3.165257000  | 6 | 0.710028000  | -1.326395000 | 3.225639000  |

|   |              |              |              |   |              |              |              |
|---|--------------|--------------|--------------|---|--------------|--------------|--------------|
| 6 | 1.373232000  | 2.386832000  | 2.257395000  | 6 | -0.475537000 | 1.271726000  | 3.287253000  |
| 6 | 1.505543000  | 0.108868000  | 3.219745000  | 6 | -0.852237000 | 2.417238000  | 2.469266000  |
| 6 | 2.475057000  | 2.118517000  | 1.437621000  | 6 | -2.509747000 | 0.088672000  | 2.519662000  |
| 6 | 2.472647000  | 2.562461000  | 0.049436000  | 6 | -2.869334000 | 1.187496000  | 1.731966000  |
| 6 | 0.223599000  | 3.109606000  | 1.725026000  | 6 | -2.023672000 | 2.374094000  | 1.705330000  |
| 6 | 0.221953000  | 3.535745000  | 0.393447000  | 6 | -0.495114000 | 3.151319000  | -1.577314000 |
| 6 | 1.369332000  | 3.253690000  | -0.460452000 | 6 | -0.861860000 | 3.439786000  | -0.197483000 |
| 6 | -0.694026000 | -1.020576000 | 3.330769000  | 6 | -2.025453000 | 2.894085000  | 0.344603000  |
| 6 | -1.346728000 | 0.280622000  | 3.274561000  | 6 | -1.311702000 | 2.328316000  | -2.360861000 |
| 6 | 0.702931000  | -1.105056000 | 3.303381000  | 6 | 0.682942000  | 1.193163000  | -3.286863000 |
| 6 | -0.576538000 | 1.446004000  | 3.193678000  | 6 | 1.532245000  | 2.055775000  | -2.474626000 |
| 6 | -0.981591000 | 2.527216000  | 2.303802000  | 6 | 0.954753000  | 3.014816000  | -1.636266000 |
| 6 | -2.555048000 | 0.146287000  | 2.470222000  | 6 | -0.709682000 | 1.326332000  | -3.232229000 |
| 6 | -2.944528000 | 1.183212000  | 1.615462000  | 6 | -0.973175000 | -1.133452000 | -3.235984000 |
| 6 | -2.140740000 | 2.397528000  | 1.530216000  | 6 | 0.475888000  | -1.271750000 | -3.293806000 |
| 6 | -0.583252000 | 3.036829000  | -1.766929000 | 6 | 1.287307000  | -0.131182000 | -3.317906000 |
| 6 | -0.985261000 | 3.398035000  | -0.413394000 | 6 | -1.554633000 | 0.139421000  | -3.206448000 |
| 6 | -2.141422000 | 2.841316000  | 0.142284000  | 6 | -3.172748000 | -0.609596000 | -1.492724000 |
| 6 | -1.355775000 | 2.135594000  | -2.508868000 | 6 | -2.568686000 | -1.934558000 | -1.525264000 |
| 6 | 0.694007000  | 1.021428000  | -3.335429000 | 6 | -1.492991000 | -2.193630000 | -2.380363000 |
| 6 | 1.498337000  | 1.961353000  | -2.564874000 | 6 | -2.678564000 | 0.407161000  | -2.316428000 |
| 6 | 0.872331000  | 2.949070000  | -1.796340000 | 6 | -2.873514000 | 2.034886000  | -0.467955000 |
| 6 | -0.702948000 | 1.105918000  | -3.308033000 | 6 | -3.392176000 | 0.978611000  | 0.387347000  |
| 6 | -0.877828000 | -1.357712000 | -3.169883000 | 6 | -3.538768000 | -0.316263000 | -0.113562000 |
| 6 | 0.576523000  | -1.445136000 | -3.198312000 | 6 | -2.528575000 | 1.759169000  | -1.793645000 |
| 6 | 1.346711000  | -0.279753000 | -3.279214000 |   |              |              |              |
| 6 | -1.505550000 | -0.108020000 | -3.224383000 |   |              |              |              |
| 6 | -3.130008000 | -0.815593000 | -1.498571000 |   |              |              |              |
| 6 | -2.475166000 | -2.117767000 | -1.442279000 |   |              |              |              |
| 6 | -1.373262000 | -2.385994000 | -2.261999000 |   |              |              |              |
| 6 | -2.654698000 | 0.169615000  | -2.370633000 |   |              |              |              |
| 6 | -2.946911000 | 1.902710000  | -0.629830000 |   |              |              |              |
| 6 | -3.442464000 | 0.876449000  | 0.279688000  |   |              |              |              |
| 6 | -3.532764000 | -0.453746000 | -0.144919000 |   |              |              |              |
| 6 | -2.562818000 | 1.556704000  | -1.928921000 |   |              |              |              |

**[10]CPP $\supset$ C<sub>60</sub> from [10]ECP $\supset$ C<sub>60</sub>**  
Gas-phase. B3LYP-D3(BJ)/def2-SVP

| Atom | X            | Y            | Z            |
|------|--------------|--------------|--------------|
| 6    | -0.653241000 | 6.797229000  | 1.282979000  |
| 6    | 2.154444000  | 6.455063000  | 1.345535000  |
| 6    | 6.299041000  | 2.693383000  | 1.396589000  |
| 6    | 6.842132000  | -0.084194000 | 1.376579000  |
| 6    | 4.493629000  | -5.173091000 | 1.248969000  |
| 6    | 2.028849000  | -6.575919000 | 1.169353000  |
| 6    | -3.545636000 | -5.906533000 | 1.047643000  |
| 6    | -5.644572000 | -3.991540000 | 1.023035000  |
| 6    | -6.740120000 | 1.497054000  | 1.061502000  |
| 6    | -5.523986000 | 4.055705000  | 1.129166000  |
| 6    | -3.985149000 | 5.600886000  | 0.020542000  |
| 6    | -2.717471000 | 6.320608000  | 0.061645000  |
| 6    | -2.028459000 | 6.574731000  | -1.167364000 |
| 6    | 0.073781000  | 6.872038000  | 0.050685000  |
| 6    | 1.523276000  | 6.698905000  | 0.082576000  |
| 6    | 3.546315000  | 5.906734000  | -1.044527000 |

**[10]CPP $\supset$ C<sub>60</sub> from [10]MCP $\supset$ C<sub>60</sub>**  
Gas-phase. B3LYP-D3(BJ)/def2-SVP

| Atom | X            | Y            | Z            |
|------|--------------|--------------|--------------|
| 6    | 6.460461000  | 1.622541000  | 1.277565000  |
| 6    | 6.624119000  | -0.730113000 | 1.267321000  |
| 6    | 3.533256000  | -5.634684000 | 1.129997000  |
| 6    | 1.338560000  | -6.506680000 | 1.060104000  |
| 6    | -4.319477000 | -5.108454000 | 0.904410000  |
| 6    | -5.873900000 | -3.318243000 | 0.858286000  |
| 6    | -6.280125000 | 2.474124000  | 0.880004000  |
| 6    | -4.992910000 | 4.463105000  | 0.941347000  |
| 6    | 0.408359000  | 6.613966000  | 1.109198000  |
| 6    | 2.697826000  | 6.028649000  | 1.176866000  |
| 6    | 4.631702000  | 4.815610000  | 0.450459000  |
| 6    | 5.588630000  | 3.705378000  | 0.478789000  |
| 6    | 5.873768000  | 3.318579000  | -0.854766000 |
| 6    | 6.669978000  | 1.197970000  | -0.060995000 |
| 6    | 6.772093000  | -0.269512000 | -0.067515000 |
| 6    | 6.280042000  | -2.474224000 | -0.876681000 |

|   |              |              |              |   |              |              |              |
|---|--------------|--------------|--------------|---|--------------|--------------|--------------|
| 6 | 4.101923000  | 5.505298000  | 0.212041000  | 6 | 6.056695000  | -2.909820000 | 0.454028000  |
| 6 | 5.183155000  | 4.527195000  | 0.224448000  | 6 | 5.270573000  | -4.147344000 | 0.415921000  |
| 6 | 5.645336000  | 3.991874000  | -1.020162000 | 6 | 4.992891000  | -4.463334000 | -0.937899000 |
| 6 | 6.600496000  | 2.064176000  | 0.145871000  | 6 | 3.196903000  | -5.888209000 | -0.224939000 |
| 6 | 6.881079000  | 0.631750000  | 0.136249000  | 6 | 1.832013000  | -6.431509000 | -0.268282000 |
| 6 | 6.739449000  | -1.496948000 | -1.059607000 | 6 | -0.408570000 | -6.614392000 | -1.105279000 |
| 6 | 6.524463000  | -2.190417000 | 0.175083000  | 6 | -0.907233000 | -6.600422000 | 0.223069000  |
| 6 | 5.906598000  | -3.511139000 | 0.140213000  | 6 | -2.332680000 | -6.244637000 | 0.181794000  |
| 6 | 5.522978000  | -4.055469000 | -1.127556000 | 6 | -2.698024000 | -6.028859000 | -1.172957000 |
| 6 | 3.984963000  | -5.601439000 | -0.018876000 | 6 | -4.631686000 | -4.815314000 | -0.446757000 |
| 6 | 2.717439000  | -6.321403000 | -0.059823000 | 6 | -5.588649000 | -3.705095000 | -0.475229000 |
| 6 | 0.652980000  | -6.798266000 | -1.280643000 | 6 | -6.460911000 | -1.622512000 | -1.274208000 |
| 6 | -0.073690000 | -6.873152000 | -0.048165000 | 6 | -6.670489000 | -1.197911000 | 0.064323000  |
| 6 | -1.523148000 | -6.699712000 | -0.079691000 | 6 | -6.772571000 | 0.269552000  | 0.070786000  |
| 6 | -2.154667000 | -6.456449000 | -1.342577000 | 6 | -6.624688000 | 0.730151000  | -1.264054000 |
| 6 | -4.101466000 | -5.505474000 | -0.208953000 | 6 | -6.056765000 | 2.909733000  | -0.450707000 |
| 6 | -5.182494000 | -4.527159000 | -0.221489000 | 6 | -5.270575000 | 4.147247000  | -4.142521000 |
| 6 | -6.298494000 | -2.693603000 | -1.393948000 | 6 | -3.533382000 | 5.634850000  | -1.126427000 |
| 6 | -6.600125000 | -2.064249000 | -0.143350000 | 6 | -3.197021000 | 5.888110000  | 0.228546000  |
| 6 | -6.881026000 | -0.631893000 | -0.133964000 | 6 | -1.832147000 | 6.431365000  | 0.272031000  |
| 6 | -6.842449000 | 0.083849000  | -1.374406000 | 6 | -1.338658000 | 6.506950000  | -1.056304000 |
| 6 | -6.699529000 | 1.475715000  | -1.363536000 | 6 | 0.025805000  | 6.612953000  | -1.311513000 |
| 1 | -6.582464000 | 1.975986000  | -2.325665000 | 1 | 0.404964000  | 6.564173000  | -2.335639000 |
| 6 | -6.947812000 | 0.112656000  | 1.048425000  | 6 | -0.958843000 | 6.555275000  | 1.364254000  |
| 1 | -7.023692000 | -0.393662000 | 2.011505000  | 1 | -1.328432000 | 6.462608000  | 2.388930000  |
| 6 | -5.465509000 | 4.165555000  | -1.294402000 | 6 | 3.182744000  | 5.847363000  | -1.223212000 |
| 1 | -5.778352000 | 3.809096000  | -2.276789000 | 1 | 2.886283000  | 5.996639000  | -2.265015000 |
| 6 | -4.600985000 | 5.106497000  | 1.175531000  | 6 | 3.858318000  | 5.334381000  | 1.500882000  |
| 1 | -4.273047000 | 5.447310000  | 2.158330000  | 1 | 4.088698000  | 5.075836000  | 2.538025000  |
| 6 | -5.627733000 | -3.921403000 | -1.401370000 | 6 | -4.585916000 | 4.788229000  | -1.456654000 |
| 1 | -5.333457000 | -4.327450000 | -2.369731000 | 1 | -4.782717000 | 4.518588000  | -2.497564000 |
| 6 | -6.373576000 | -2.795158000 | 1.029048000  | 6 | -3.972774000 | 5.353960000  | 1.270804000  |
| 1 | -6.640813000 | -2.370297000 | 1.997749000  | 1 | -3.692080000 | 5.522866000  | 2.313917000  |
| 6 | -2.289845000 | -6.527254000 | 1.078845000  | 6 | -6.668620000 | 1.163308000  | 1.148503000  |
| 1 | -1.860510000 | -6.750345000 | 2.056788000  | 1 | -6.746508000 | 0.805833000  | 2.178916000  |
| 6 | -3.434609000 | -5.893643000 | -1.375541000 | 6 | -6.290317000 | 2.051360000  | -1.535701000 |
| 1 | -3.842960000 | -5.633612000 | -2.352741000 | 1 | -6.070968000 | 2.370885000  | -2.557882000 |
| 6 | 0.660623000  | -6.876285000 | 1.143371000  | 6 | -6.444620000 | -2.077631000 | 1.135470000  |
| 1 | 0.149701000  | -6.979024000 | 2.101617000  | 1 | -6.575066000 | -1.741214000 | 2.167773000  |
| 6 | 2.030565000  | -6.555799000 | -1.255480000 | 6 | -5.941441000 | -2.881554000 | -1.554722000 |
| 1 | 2.530430000  | -6.408166000 | -2.213473000 | 1 | -5.674899000 | -3.160301000 | -2.577852000 |
| 6 | 4.600124000  | -5.106371000 | -1.173927000 | 6 | -3.858418000 | -5.334463000 | -1.497080000 |
| 1 | 4.271736000  | -5.446785000 | -2.156711000 | 1 | -4.088730000 | -5.076033000 | -2.534267000 |
| 6 | 5.465273000  | -4.166025000 | 1.295980000  | 6 | -3.182698000 | -5.846747000 | 1.227111000  |
| 1 | 5.778547000  | -3.810113000 | 2.278435000  | 1 | -2.886078000 | -5.995618000 | 2.268929000  |
| 6 | 6.698896000  | -1.476017000 | 1.365447000  | 6 | -0.025882000 | -6.612511000 | 1.315420000  |
| 1 | 6.581853000  | -1.976523000 | 2.327455000  | 1 | -0.404989000 | -6.563324000 | 2.339545000  |
| 6 | 6.947657000  | -0.112620000 | -1.046246000 | 6 | 0.958645000  | -6.555883000 | -1.360416000 |
| 1 | 7.023476000  | 0.393857000  | -2.009250000 | 1 | 1.328161000  | -6.463377000 | -2.385134000 |
| 6 | 6.374159000  | 2.795379000  | -1.026394000 | 6 | 3.972711000  | -5.354214000 | -1.267248000 |
| 1 | 6.641483000  | 2.370733000  | -1.995166000 | 1 | 3.691967000  | -5.523145000 | -2.310343000 |
| 6 | 5.628457000  | 3.921279000  | 1.404224000  | 6 | 4.585851000  | -4.788132000 | 1.460125000  |
| 1 | 5.334541000  | 4.327390000  | 2.372673000  | 1 | 4.782805000  | -4.518549000 | 2.501021000  |
| 6 | 3.434537000  | 5.892603000  | 1.378622000  | 6 | 6.289981000  | -2.051364000 | 1.539001000  |
| 1 | 3.842663000  | 5.632200000  | 2.355817000  | 1 | 6.070707000  | -2.370903000 | 2.561194000  |
| 6 | 2.290386000  | 6.527166000  | -1.075786000 | 6 | 6.668383000  | -1.163349000 | -1.145205000 |

|   |              |              |              |   |              |              |              |
|---|--------------|--------------|--------------|---|--------------|--------------|--------------|
| 1 | 1.861302000  | 6.750629000  | -2.053757000 | 1 | 6.746039000  | -0.805864000 | -2.175631000 |
| 6 | -0.660216000 | 6.875032000  | -1.141035000 | 6 | 6.444190000  | 2.077842000  | -1.132053000 |
| 6 | -6.525098000 | 2.190324000  | -0.173304000 | 6 | 0.907118000  | 6.600600000  | -0.219128000 |
| 6 | -5.907286000 | 3.511082000  | -0.138575000 | 6 | 2.332599000  | 6.244859000  | -0.177851000 |
| 6 | -4.493410000 | 5.172165000  | -1.247343000 | 6 | 4.319631000  | 5.109140000  | -0.900642000 |
| 1 | -0.149021000 | 6.977338000  | -2.099177000 | 1 | 6.574363000  | 1.741448000  | -2.164397000 |
| 6 | -2.030869000 | 6.555028000  | 1.257471000  | 6 | 5.941302000  | 2.881679000  | 1.558200000  |
| 1 | -2.531066000 | 6.407600000  | 2.215317000  | 1 | 5.674885000  | 3.160405000  | 2.581372000  |
| 1 | -6.742028922 | 2.043835531  | 2.005257592  | 1 | -2.041753437 | 6.481511953  | -1.893282657 |
| 1 | -5.947850670 | 3.654912657  | 2.050769246  | 1 | -2.956314581 | 6.112554613  | -1.922865985 |
| 1 | -0.136235882 | 6.928200841  | 2.234399196  | 1 | -6.776531619 | 0.033187982  | -2.092733448 |
| 1 | 1.640479570  | 6.706196111  | 2.274201264  | 1 | -6.712039611 | -0.948601346 | -2.097799168 |
| 1 | 6.923566081  | 0.451941729  | 2.322927390  | 1 | -2.058597721 | -6.413724142 | -1.972041737 |
| 1 | 6.589695988  | 2.219468092  | 2.334977322  | 1 | -1.109753920 | -6.672063400 | -1.942260888 |
| 1 | 2.565086686  | -6.536301443 | 2.118314483  | 1 | 5.585815838  | -4.002908455 | -1.732865675 |
| 1 | 4.127367415  | -5.627389517 | 2.170442609  | 1 | 6.145654250  | -3.176801721 | -1.703632050 |
| 1 | -5.430966906 | -4.510303721 | 1.958398763  | 1 | 5.643212099  | 4.002408630  | -1.676194375 |
| 1 | -4.095094958 | -5.730409721 | 1.973236727  | 1 | 4.977649470  | 4.752692373  | -1.697812209 |
| 1 | -1.641095695 | -6.708282228 | -2.271271161 | 1 | 6.775712148  | -0.033085738 | 2.095992270  |
| 1 | 0.135757595  | -6.929382433 | -2.231925171 | 1 | 6.711400904  | 0.948498698  | 2.101105952  |
| 1 | -6.923917725 | -0.452464126 | -2.320650885 | 1 | 2.058218587  | 6.413082030  | 1.976013773  |
| 1 | -6.589156417 | -2.219867725 | -2.332424719 | 1 | 1.109494739  | 6.671311757  | 1.946242622  |
| 1 | 5.946496584  | -3.654360356 | -2.049180744 | 1 | -5.585832666 | 4.002579176  | 1.736257207  |
| 1 | 6.740933705  | -2.043508594 | -2.003491324 | 1 | -6.145619669 | 3.176661377  | 1.706970208  |
| 1 | 4.096046808  | 5.731119469  | -1.970055379 | 1 | -5.643189353 | -4.001947877 | 1.679774770  |
| 1 | 5.431953841  | 4.510938874  | -1.955409569 | 1 | -4.977338289 | -4.751625170 | 1.701539393  |
| 1 | -4.126469084 | 5.625855138  | -2.168846080 | 1 | 2.041696064  | -6.481053005 | 1.897042763  |
| 1 | -2.564388985 | 6.534868877  | -2.116489053 | 1 | 2.956096096  | -6.112156853 | 1.926507941  |
| 6 | 0.583206000  | -3.035981000 | 1.762285000  | 6 | 0.495485000  | -3.151356000 | 1.570713000  |
| 6 | -0.872388000 | -2.948260000 | 1.791671000  | 6 | -0.954408000 | -3.014877000 | 1.629683000  |
| 6 | 1.355759000  | -2.134751000 | 2.504215000  | 6 | 1.312077000  | -2.328398000 | 2.354292000  |
| 6 | -1.498352000 | -1.960538000 | 2.560234000  | 6 | -1.531912000 | -2.055826000 | 2.468012000  |
| 6 | -2.650247000 | -1.240596000 | 2.029173000  | 6 | -2.663566000 | -1.264580000 | 1.998541000  |
| 6 | -1.369402000 | -3.252911000 | 0.455771000  | 6 | -1.478431000 | -3.214365000 | 0.284657000  |
| 6 | -2.472707000 | -2.561606000 | -0.054002000 | 6 | -2.560768000 | -2.457894000 | -0.166054000 |
| 6 | -3.126704000 | -1.534118000 | 0.747354000  | 6 | -3.162273000 | -1.459754000 | 0.706457000  |
| 6 | 2.946883000  | -1.901817000 | 0.625199000  | 6 | 2.874021000  | -2.035035000 | 0.461393000  |
| 6 | 2.141516000  | -2.840495000 | -0.146964000 | 6 | 2.025882000  | -2.894144000 | -0.351182000 |
| 6 | 2.562818000  | -1.555878000 | 1.924303000  | 6 | 2.528940000  | -1.759260000 | 1.787055000  |
| 6 | 0.985265000  | -3.397109000 | 0.408732000  | 6 | 0.862241000  | -3.439732000 | 0.190899000  |
| 6 | -0.221958000 | -3.534756000 | -0.398074000 | 6 | -0.357529000 | -3.482091000 | -0.602491000 |
| 6 | 2.140722000  | -2.396579000 | -1.534827000 | 6 | 2.024024000  | -2.374105000 | -1.711910000 |
| 6 | 0.981588000  | -2.526314000 | -2.308442000 | 6 | 0.852581000  | -2.417234000 | -2.475827000 |
| 6 | -0.223547000 | -3.108733000 | -1.729681000 | 6 | -0.364027000 | -2.986609000 | -1.909706000 |
| 6 | 3.130046000  | 0.816435000  | 1.493957000  | 6 | 3.173127000  | 0.609513000  | 1.486161000  |
| 6 | 3.532923000  | 0.454659000  | 0.140298000  | 6 | 3.539125000  | 0.316177000  | 0.107006000  |
| 6 | 2.654717000  | -0.168771000 | 2.366011000  | 6 | 2.678907000  | -0.407246000 | 2.309832000  |
| 6 | 3.442494000  | -0.875542000 | -0.284322000 | 6 | 3.392606000  | -0.978698000 | -0.393908000 |
| 6 | 2.944505000  | -1.182290000 | -1.620088000 | 6 | 2.869709000  | -1.187555000 | -1.738555000 |
| 6 | 3.126638000  | 1.534981000  | -0.751972000 | 6 | 3.162529000  | 1.459609000  | -0.713022000 |
| 6 | 2.650240000  | 1.241496000  | -2.033809000 | 6 | 2.663901000  | 1.264536000  | -2.005143000 |
| 6 | 2.555031000  | -0.145403000 | -2.474873000 | 6 | 2.510107000  | -0.088716000 | -2.526238000 |
| 6 | 0.877807000  | 1.358563000  | 3.165257000  | 6 | 0.973534000  | 1.133420000  | 3.229454000  |
| 6 | 1.373232000  | 2.386832000  | 2.257395000  | 6 | 1.493324000  | 2.193578000  | 2.373757000  |
| 6 | 1.505543000  | 0.108868000  | 3.219745000  | 6 | 1.554950000  | -0.139477000 | 3.199830000  |
| 6 | 2.475057000  | 2.118517000  | 1.437621000  | 6 | 2.569016000  | 1.934451000  | 1.518693000  |

|   |              |              |              |   |              |              |              |
|---|--------------|--------------|--------------|---|--------------|--------------|--------------|
| 6 | 2.472647000  | 2.562461000  | 0.049436000  | 6 | 2.561055000  | 2.457762000  | 0.159495000  |
| 6 | 0.223599000  | 3.109606000  | 1.725026000  | 6 | 0.364382000  | 2.986553000  | 1.903108000  |
| 6 | 0.221953000  | 3.535745000  | 0.393447000  | 6 | 0.357916000  | 3.482182000  | 0.595937000  |
| 6 | 1.369332000  | 3.253690000  | -0.460452000 | 6 | 1.478759000  | 3.214253000  | -0.291223000 |
| 6 | -0.694026000 | -1.020576000 | 3.330769000  | 6 | -0.682592000 | -1.193204000 | 3.280253000  |
| 6 | -1.346728000 | 0.280622000  | 3.274561000  | 6 | -1.286939000 | 0.131139000  | 3.311333000  |
| 6 | 0.702931000  | -1.105056000 | 3.303381000  | 6 | 0.710028000  | -1.326395000 | 3.225639000  |
| 6 | -0.576538000 | 1.446004000  | 3.193678000  | 6 | -0.475537000 | 1.271726000  | 3.287253000  |
| 6 | -0.981591000 | 2.527216000  | 2.303802000  | 6 | -0.852237000 | 2.417238000  | 2.469266000  |
| 6 | -2.555048000 | 0.146287000  | 2.470222000  | 6 | -2.509747000 | 0.088672000  | 2.519662000  |
| 6 | -2.944528000 | 1.183212000  | 1.615462000  | 6 | -2.869334000 | 1.187496000  | 1.731966000  |
| 6 | -2.140740000 | 2.397528000  | 1.530216000  | 6 | -2.023672000 | 2.374094000  | 1.705330000  |
| 6 | -0.583252000 | 3.036829000  | -1.766929000 | 6 | -0.495114000 | 3.151319000  | -1.577314000 |
| 6 | -0.985261000 | 3.398035000  | -0.413394000 | 6 | -0.861860000 | 3.439786000  | -0.197483000 |
| 6 | -2.141422000 | 2.841316000  | 0.142284000  | 6 | -2.025453000 | 2.894085000  | 0.344603000  |
| 6 | -1.355775000 | 2.135594000  | -2.508868000 | 6 | -1.311702000 | 2.328316000  | -2.360861000 |
| 6 | 0.694007000  | 1.021428000  | -3.335429000 | 6 | 0.682942000  | 1.193163000  | -3.286863000 |
| 6 | 1.498337000  | 1.961353000  | -2.564874000 | 6 | 1.532245000  | 2.055775000  | -2.474626000 |
| 6 | 0.872331000  | 2.949070000  | -1.796340000 | 6 | 0.954753000  | 3.014816000  | -1.636266000 |
| 6 | -0.702948000 | 1.105918000  | -3.308033000 | 6 | -0.709682000 | 1.326332000  | -3.232229000 |
| 6 | -0.877828000 | -1.357712000 | -3.169883000 | 6 | -0.973175000 | -1.133452000 | -3.235984000 |
| 6 | 0.576523000  | -1.445136000 | -3.198312000 | 6 | 0.475888000  | -1.271750000 | -3.293806000 |
| 6 | 1.346711000  | -0.279753000 | -3.279214000 | 6 | 1.287307000  | -0.131182000 | -3.317906000 |
| 6 | -1.505550000 | -0.108020000 | -3.224383000 | 6 | -1.554633000 | 0.139421000  | -3.206448000 |
| 6 | -3.130008000 | -0.815593000 | -1.498571000 | 6 | -3.172748000 | -0.609596000 | -1.492724000 |
| 6 | -2.475166000 | -2.117767000 | -1.442279000 | 6 | -2.568686000 | -1.934558000 | -1.525264000 |
| 6 | -1.373262000 | -2.385994000 | -2.261999000 | 6 | -1.492991000 | -2.193630000 | -2.380363000 |
| 6 | -2.654698000 | 0.169615000  | -2.370633000 | 6 | -2.678564000 | 0.407161000  | -2.316428000 |
| 6 | -2.946911000 | 1.902710000  | -0.629830000 | 6 | -2.873514000 | 2.034886000  | -0.467955000 |
| 6 | -3.442464000 | 0.876449000  | 0.279688000  | 6 | -3.392176000 | 0.978611000  | 0.387347000  |
| 6 | -3.532764000 | -0.453746000 | -0.144919000 | 6 | -3.538768000 | -0.316263000 | -0.113562000 |
| 6 | -2.562818000 | 1.556704000  | -1.928921000 | 6 | -2.528575000 | 1.759169000  | -1.793645000 |

**[10]NCPD>C<sub>60</sub>**

Gas-phase. B3LYP-D3(BJ)/def2-SVP

| Atom | X            | Y            | Z            |
|------|--------------|--------------|--------------|
| 6    | -5.979540000 | -2.873297000 | 0.914389000  |
| 6    | -6.611602000 | -0.696836000 | 0.931019000  |
| 6    | -4.618876000 | 4.763175000  | 1.013351000  |
| 6    | -2.719891000 | 6.000007000  | 1.049346000  |
| 6    | 3.121501000  | 5.801295000  | 1.120940000  |
| 6    | 4.911228000  | 4.406990000  | 1.126998000  |
| 6    | 6.563587000  | -1.201459000 | 1.081181000  |
| 6    | 5.784422000  | -3.333139000 | 1.052018000  |
| 6    | 0.890037000  | -6.530319000 | 0.953295000  |
| 6    | -1.376938000 | -6.452959000 | 0.926346000  |
| 6    | -3.516175000 | -5.638675000 | 0.244993000  |
| 6    | -4.662477000 | -4.746246000 | 0.241522000  |
| 6    | -4.911515000 | -4.407291000 | -1.127858000 |
| 6    | -6.172338000 | -2.494555000 | -0.454190000 |
| 6    | -6.583674000 | -1.098888000 | -0.443909000 |
| 6    | -6.563868000 | 1.201758000  | -1.081802000 |
| 6    | -6.514698000 | 1.599813000  | 0.292504000  |
| 6    | -6.021212000 | 2.965575000  | 0.310948000  |
| 6    | -5.785056000 | 3.333635000  | -1.052661000 |

**[10]OCPD>C<sub>60</sub>**

Gas-phase. B3LYP-D3(BJ)/def2-SVP

| Atom | X            | Y            | Z            |
|------|--------------|--------------|--------------|
| 6    | -6.394762000 | -1.843212000 | 0.703914000  |
| 6    | -6.640703000 | 0.352742000  | 0.688732000  |
| 6    | -3.738921000 | 5.441669000  | 0.809292000  |
| 6    | -1.733255000 | 6.366674000  | 0.888798000  |
| 6    | 3.979784000  | 5.184167000  | 1.130723000  |
| 6    | 5.484531000  | 3.572026000  | 1.203066000  |
| 6    | 6.131467000  | -2.214141000 | 1.243930000  |
| 6    | 5.046305000  | -4.133034000 | 1.198516000  |
| 6    | -0.245693000 | -6.560730000 | 0.987604000  |
| 6    | -2.405428000 | -6.111096000 | 0.895541000  |
| 6    | -4.367442000 | -4.969609000 | 0.223335000  |
| 6    | -5.365121000 | -3.910691000 | 0.174736000  |
| 6    | -5.484915000 | -3.572185000 | -1.201437000 |
| 6    | -6.457754000 | -1.479997000 | -0.669340000 |
| 6    | -6.616157000 | -0.034350000 | -0.679261000 |
| 6    | -6.131892000 | 2.214361000  | -1.241278000 |
| 6    | -6.101500000 | 2.593605000  | 0.130094000  |
| 6    | -5.381144000 | 3.860106000  | 0.160043000  |
| 6    | -5.046827000 | 4.133351000  | -1.195960000 |

|   |              |              |              |   |              |              |              |
|---|--------------|--------------|--------------|---|--------------|--------------|--------------|
| 6 | -4.317931000 | 5.082561000  | -0.349817000 | 6 | -3.375142000 | 5.677363000  | -0.545444000 |
| 6 | -3.097835000 | 5.873920000  | -0.327446000 | 6 | -2.056271000 | 6.287055000  | -0.493242000 |
| 6 | -0.889945000 | 6.530351000  | -0.954215000 | 6 | 0.245395000  | 6.560677000  | -0.985869000 |
| 6 | -0.495112000 | 6.595850000  | 0.422049000  | 6 | 0.574677000  | 6.589176000  | 0.397752000  |
| 6 | 0.958440000  | 6.550585000  | 0.438941000  | 6 | 1.998104000  | 6.289107000  | 0.458077000  |
| 6 | 1.377078000  | 6.453287000  | -0.927317000 | 6 | 2.405154000  | 6.110945000  | -0.894099000 |
| 6 | 3.516335000  | 5.638854000  | -0.245919000 | 6 | 4.367155000  | 4.969268000  | -0.221990000 |
| 6 | 4.662488000  | 4.746185000  | -0.242394000 | 6 | 5.364804000  | 3.910273000  | -0.173196000 |
| 6 | 5.979812000  | 2.873384000  | -0.915207000 | 6 | 6.395131000  | 1.843010000  | -0.701853000 |
| 6 | 6.172337000  | 2.494577000  | 0.453380000  | 6 | 6.457548000  | 1.479950000  | 0.671442000  |
| 6 | 6.583958000  | 1.099052000  | 0.443143000  | 6 | 6.616086000  | 0.034363000  | 0.681635000  |
| 6 | 6.612333000  | 0.696997000  | -0.931766000 | 6 | 6.641480000  | -0.352935000 | -0.686286000 |
| 6 | 6.515054000  | -1.599673000 | -0.293112000 | 6 | 6.101750000  | -2.593629000 | -0.127399000 |
| 6 | 6.021200000  | -2.965353000 | -0.311577000 | 6 | 5.381075000  | -3.859996000 | -0.157424000 |
| 6 | 4.619123000  | -4.763154000 | -1.014132000 | 6 | 3.739093000  | -5.441814000 | -0.806799000 |
| 6 | 4.317799000  | -5.082273000 | 0.349008000  | 6 | 3.374983000  | -5.677381000 | 0.547873000  |
| 6 | 3.097703000  | -5.873503000 | 0.326538000  | 6 | 2.056077000  | -6.286970000 | 0.495467000  |
| 6 | 2.720137000  | -6.000178000 | -1.050282000 | 6 | 1.733225000  | -6.366415000 | -0.886628000 |
| 6 | 1.438495000  | -6.385612000 | -1.439040000 | 6 | 0.441085000  | -6.547341000 | -1.365730000 |
| 1 | 1.138153000  | -6.373473000 | -2.489441000 | 1 | 0.222629000  | -6.482103000 | -2.432323000 |
| 6 | 2.188426000  | -6.202775000 | 1.341756000  | 6 | 1.052006000  | -6.435480000 | 1.467038000  |
| 1 | 2.438327000  | -6.038000000 | 2.392701000  | 1 | 1.247197000  | -6.295587000 | 2.530857000  |
| 6 | -1.864416000 | -6.285322000 | -1.478703000 | 6 | -2.826720000 | -5.860935000 | -1.505607000 |
| 1 | -1.539109000 | -6.298125000 | -2.521613000 | 1 | -2.514313000 | -5.908571000 | -2.549579000 |
| 6 | -2.655153000 | -6.026069000 | 1.282744000  | 6 | -3.589488000 | -5.487432000 | 1.271191000  |
| 1 | -2.917627000 | -5.837949000 | 2.326527000  | 1 | -3.805573000 | -5.267301000 | 2.317706000  |
| 6 | 5.491612000  | -3.732296000 | -1.359270000 | 6 | 4.749470000  | -4.567515000 | -1.194122000 |
| 1 | 5.631577000  | -3.429400000 | -2.399615000 | 1 | 4.915441000  | -4.322112000 | -2.244090000 |
| 6 | 4.963727000  | -4.407502000 | 1.396717000  | 6 | 4.073002000  | -5.044620000 | 1.587405000  |
| 1 | 4.696165000  | -4.608220000 | 2.436906000  | 1 | 3.764346000  | -5.133341000 | 2.629893000  |
| 6 | 6.632030000  | 0.137676000  | 1.464280000  | 6 | 6.402560000  | -0.925402000 | 1.683619000  |
| 1 | 6.555549000  | 0.429769000  | 2.514160000  | 1 | 6.294835000  | -0.655825000 | 2.734957000  |
| 6 | 6.602500000  | -0.642268000 | -1.314293000 | 6 | 6.415138000  | -1.653357000 | -1.123697000 |
| 1 | 6.507743000  | -0.929426000 | -2.363978000 | 1 | 6.318114000  | -1.879445000 | -2.186462000 |
| 6 | 5.692451000  | 3.309206000  | 1.489694000  | 6 | 6.038330000  | 2.383820000  | 1.660690000  |
| 1 | 5.793432000  | 3.002685000  | 2.533512000  | 1 | 5.987315000  | 2.108881000  | 2.714860000  |
| 6 | 5.258183000  | 4.010017000  | -1.277062000 | 6 | 5.878211000  | 3.050073000  | -1.157764000 |
| 1 | 5.024701000  | 4.226253000  | -2.322473000 | 1 | 5.721850000  | 3.230602000  | -2.222148000 |
| 6 | 2.655296000  | 6.026342000  | -1.283669000 | 6 | 3.589025000  | 5.486960000  | -1.269823000 |
| 1 | 2.917804000  | 5.838211000  | -2.327445000 | 1 | 3.804970000  | 5.266831000  | -2.316367000 |
| 6 | 1.864353000  | 6.285148000  | 1.477737000  | 6 | 2.826578000  | 5.861006000  | 1.507019000  |
| 1 | 1.538774000  | 6.297169000  | 2.520571000  | 1 | 2.514562000  | 5.909158000  | 2.551083000  |
| 6 | -1.438235000 | 6.385295000  | 1.438119000  | 6 | -0.441000000 | 6.547554000  | 1.367641000  |
| 1 | -1.137886000 | 6.372749000  | 2.488509000  | 1 | -0.222276000 | 6.482747000  | 2.434204000  |
| 6 | -2.188404000 | 6.202990000  | -1.342638000 | 6 | -1.052407000 | 6.435510000  | -1.465015000 |
| 1 | -2.438420000 | 6.038561000  | -2.393612000 | 1 | -1.247833000 | 6.295085000  | -2.528720000 |
| 6 | -4.964349000 | 4.408022000  | -1.397417000 | 6 | -4.073412000 | 5.044815000  | -1.584911000 |
| 1 | -4.697310000 | 4.609086000  | -2.437677000 | 1 | -3.764851000 | 5.133536000  | -2.627430000 |
| 6 | -5.490999000 | 3.732103000  | 1.358578000  | 6 | -4.749246000 | 4.567405000  | 1.196730000  |
| 1 | -5.630028000 | 3.428638000  | 2.398880000  | 1 | -4.915227000 | 4.322103000  | 2.246717000  |
| 6 | -6.601633000 | 0.642383000  | 1.313642000  | 6 | -6.414250000 | 1.653071000  | 1.126323000  |
| 1 | -6.506388000 | 0.929413000  | 2.363317000  | 1 | -6.317014000 | 1.878991000  | 2.189103000  |
| 6 | -6.632348000 | -0.137382000 | -1.464960000 | 6 | -6.403228000 | 0.925711000  | -1.681113000 |
| 1 | -6.556774000 | -0.429379000 | -2.514933000 | 1 | -6.295871000 | 0.656254000  | -2.732524000 |
| 6 | -5.692662000 | -3.309401000 | -1.490476000 | 6 | -6.038575000 | -2.383782000 | -1.658751000 |
| 6 | 0.495249000  | -6.595950000 | -0.422995000 | 6 | -0.574790000 | -6.589135000 | -0.396068000 |

|   |              |              |              |   |              |              |              |
|---|--------------|--------------|--------------|---|--------------|--------------|--------------|
| 6 | -0.958351000 | -6.550504000 | -0.439919000 | 6 | -1.998220000 | -6.289027000 | -0.456614000 |
| 6 | -3.121578000 | -5.801427000 | -1.121883000 | 6 | -3.980154000 | -5.184435000 | -1.129378000 |
| 1 | -5.793696000 | -3.002901000 | -2.534301000 | 1 | -5.987910000 | -2.108792000 | -2.712926000 |
| 6 | -5.257811000 | -4.009858000 | 1.276209000  | 6 | -5.877724000 | -3.050314000 | 1.159508000  |
| 1 | -5.023521000 | -4.225551000 | 2.321554000  | 1 | -5.720442000 | -3.230635000 | 2.223797000  |
| 7 | 3.734068000  | -5.458736000 | -1.840062000 | 8 | 2.793634000  | -5.958669000 | -1.663237000 |
| 7 | 6.269174000  | -2.312571000 | 1.871951000  | 8 | 5.600001000  | -3.199500000 | 2.041016000  |
| 7 | 6.403995000  | 1.822220000  | -1.728320000 | 8 | 6.622424000  | 0.751809000  | -1.507643000 |
| 7 | 4.069368000  | 5.175835000  | 1.934259000  | 8 | 4.735453000  | 4.418420000  | 1.986622000  |
| 7 | 0.256980000  | 6.601903000  | -1.746075000 | 8 | 1.372101000  | 6.390438000  | -1.758147000 |
| 7 | -3.733676000 | 5.458569000  | 1.839240000  | 8 | -2.793521000 | 5.958829000  | 1.665586000  |
| 7 | -6.270240000 | 2.313165000  | -1.872545000 | 8 | -5.600757000 | 3.199893000  | -2.038404000 |
| 7 | -6.403237000 | -1.822020000 | 1.727562000  | 8 | -6.621315000 | -0.752077000 | 1.509952000  |
| 7 | -4.069756000 | -5.176278000 | -1.935160000 | 8 | -4.735976000 | -4.418599000 | -1.985180000 |
| 7 | -0.256891000 | -6.601393000 | 1.745121000  | 8 | -1.372552000 | -6.390574000 | 1.759697000  |
| 1 | -0.256679000 | -6.275655000 | 2.703114000  | 6 | 0.727415000  | -3.159528000 | 1.451910000  |
| 1 | 3.550851000  | -5.153286000 | -2.787595000 | 6 | -0.726657000 | -3.129311000 | 1.517275000  |
| 1 | 5.972816000  | -2.216950000 | 2.834516000  | 6 | 1.485304000  | -2.313639000 | 2.266948000  |
| 1 | 6.091597000  | 1.738222000  | -2.687211000 | 6 | -1.369467000 | -2.251442000 | 2.393412000  |
| 1 | 3.839236000  | 4.884644000  | 2.876151000  | 6 | -2.554568000 | -1.525589000 | 1.954203000  |
| 1 | 0.256816000  | 6.276262000  | -2.704105000 | 6 | -1.238913000 | -3.315766000 | 0.166452000  |
| 1 | -3.550436000 | 5.153044000  | 2.786742000  | 6 | -2.373002000 | -2.623514000 | -0.255978000 |
| 1 | -5.974304000 | 2.217769000  | -2.835265000 | 6 | -3.037920000 | -1.705226000 | 0.655172000  |
| 1 | -6.090573000 | -1.738040000 | 2.686368000  | 6 | 3.012076000  | -1.836885000 | 0.383270000  |
| 1 | -3.839692000 | -4.885071000 | -2.877068000 | 6 | 2.225524000  | -2.721082000 | -0.463058000 |
| 6 | 0.098669000  | -3.129261000 | 1.691525000  | 6 | 2.654044000  | -1.637160000 | 1.719520000  |
| 6 | -1.335660000 | -2.900033000 | 1.567870000  | 6 | 1.106887000  | -3.364395000 | 0.060705000  |
| 6 | 0.864559000  | -2.332319000 | 2.549265000  | 6 | -0.107113000 | -3.464621000 | -0.732734000 |
| 6 | -1.952598000 | -1.886327000 | 2.308683000  | 6 | 2.184350000  | -2.154807000 | -1.805067000 |
| 6 | -2.966190000 | -1.042015000 | 1.687291000  | 6 | 1.016243000  | -2.253033000 | -2.568713000 |
| 6 | -1.701829000 | -3.105268000 | 0.173429000  | 6 | -0.154232000 | -2.927546000 | -2.021560000 |
| 6 | -2.671598000 | -2.300860000 | -0.422259000 | 6 | 3.123237000  | 0.778431000  | 1.508643000  |
| 6 | -3.313333000 | -1.245215000 | 0.347443000  | 6 | 3.497366000  | 0.564083000  | 0.117079000  |
| 6 | 2.662950000  | -2.189132000 | 0.858625000  | 6 | 2.710046000  | -0.300475000 | 2.295712000  |
| 6 | 1.868838000  | -3.022660000 | -0.033791000 | 6 | 3.444671000  | -0.714627000 | -0.433635000 |
| 6 | 2.176118000  | -1.854906000 | 2.125789000  | 6 | 2.941358000  | -0.910937000 | -1.787143000 |
| 6 | 0.613001000  | -3.475890000 | 0.372633000  | 6 | 3.038064000  | 1.705320000  | -0.658129000 |
| 6 | -0.500065000 | -3.463892000 | -0.562219000 | 6 | 2.554709000  | 1.525733000  | -1.957156000 |
| 6 | 2.065432000  | -2.540791000 | -1.394991000 | 6 | 2.499653000  | 0.188020000  | -2.531558000 |
| 6 | 0.995018000  | -2.536288000 | -2.295825000 | 6 | 0.901181000  | 1.076985000  | 3.275263000  |
| 6 | -0.315241000 | -3.013574000 | -1.871468000 | 6 | 1.339048000  | 2.201983000  | 2.458260000  |
| 6 | 3.002793000  | 0.461904000  | 1.856864000  | 6 | 1.572919000  | -0.148386000 | 3.196539000  |
| 6 | 3.509512000  | 0.106771000  | 0.536869000  | 6 | 2.425284000  | 2.053210000  | 1.592118000  |
| 6 | 2.345289000  | -0.498538000 | 2.633315000  | 6 | 2.373212000  | 2.623655000  | 0.253036000  |
| 6 | 3.348482000  | -1.191346000 | 0.050622000  | 6 | 0.154310000  | 2.927636000  | 2.018482000  |
| 6 | 2.981420000  | -1.408067000 | -1.342665000 | 6 | 0.107270000  | 3.464704000  | 0.729602000  |
| 6 | 3.313187000  | 1.245026000  | -0.346086000 | 6 | 1.239028000  | 3.315737000  | -0.169585000 |
| 6 | 2.966006000  | 1.041836000  | -1.685898000 | 6 | -0.582215000 | -1.362585000 | 3.238868000  |
| 6 | 2.792244000  | -0.314002000 | -2.193376000 | 6 | -1.281246000 | -0.087389000 | 3.321405000  |
| 6 | 0.640630000  | 1.167299000  | 3.303004000  | 6 | 0.815654000  | -1.392903000 | 3.177893000  |
| 6 | 1.326792000  | 2.168985000  | 2.496063000  | 6 | -0.554102000 | 1.108362000  | 3.339223000  |
| 6 | 1.139665000  | -0.138997000 | 3.369809000  | 6 | -1.016133000 | 2.253160000  | 2.565570000  |
| 6 | 2.482813000  | 1.821651000  | 1.786600000  | 6 | -2.499535000 | -0.187961000 | 2.528568000  |
| 6 | 2.671515000  | 2.300698000  | 0.423624000  | 6 | -2.941320000 | 0.911035000  | 1.784181000  |
| 6 | 0.315084000  | 3.013423000  | 1.872863000  | 6 | -2.184396000 | 2.155008000  | 1.802018000  |
| 6 | 0.499907000  | 3.463756000  | 0.563620000  | 6 | -0.727318000 | 3.159455000  | -1.454989000 |

|   |              |              |              |   |              |              |              |
|---|--------------|--------------|--------------|---|--------------|--------------|--------------|
| 6 | 1.701679000  | 3.105061000  | -0.172009000 | 6 | -1.106786000 | 3.364438000  | -0.063754000 |
| 6 | -1.153116000 | -1.052785000 | 3.198143000  | 6 | -2.225452000 | 2.721055000  | 0.459895000  |
| 6 | -1.672104000 | 0.305880000  | 3.128791000  | 6 | -1.485286000 | 2.313688000  | -2.270087000 |
| 6 | 0.225019000  | -1.271254000 | 3.316580000  | 6 | 0.582341000  | 1.362580000  | -3.241949000 |
| 6 | -0.793593000 | 1.394429000  | 3.181126000  | 6 | 1.369552000  | 2.251405000  | -2.396487000 |
| 6 | -0.995199000 | 2.536232000  | 2.297268000  | 6 | 0.726688000  | 3.129250000  | -1.520368000 |
| 6 | -2.792412000 | 0.313861000  | 2.194809000  | 6 | -0.815564000 | 1.392970000  | -3.181036000 |
| 6 | -2.981590000 | 1.407921000  | 1.344081000  | 6 | -0.901090000 | -1.076950000 | -3.278403000 |
| 6 | -2.065568000 | 2.540680000  | 1.396360000  | 6 | 0.554156000  | -1.108295000 | -3.342334000 |
| 6 | -0.098777000 | 3.129047000  | -1.690166000 | 6 | 1.281372000  | 0.087455000  | -3.324447000 |
| 6 | -0.613108000 | 3.475744000  | -0.371291000 | 6 | -1.572808000 | 0.148438000  | -3.199700000 |
| 6 | -1.868958000 | 3.022498000  | 0.035137000  | 6 | -3.122921000 | -0.778429000 | -1.511748000 |
| 6 | -0.864633000 | 2.332099000  | -2.547873000 | 6 | -2.425269000 | -2.053394000 | -1.595214000 |
| 6 | 1.153057000  | 1.052669000  | -3.196837000 | 6 | -1.338942000 | -2.201902000 | -2.461328000 |
| 6 | 1.952544000  | 1.886254000  | -2.307359000 | 6 | -2.709961000 | 0.300474000  | -2.298897000 |
| 6 | 1.335555000  | 2.899892000  | -1.566456000 | 6 | -3.011912000 | 1.836786000  | -0.386379000 |
| 6 | -0.225080000 | 1.271087000  | -3.315244000 | 6 | -3.444206000 | 0.714480000  | 0.430562000  |
| 6 | -0.640740000 | -1.167454000 | -3.301659000 | 6 | -3.497170000 | -0.564152000 | -0.120238000 |
| 6 | 0.793470000  | -1.394541000 | -3.179723000 | 6 | -2.653951000 | 1.637107000  | -1.722648000 |
| 6 | 1.672024000  | -0.306022000 | -3.127442000 |   |              |              |              |
| 6 | -1.139744000 | 0.138845000  | -3.368455000 |   |              |              |              |
| 6 | -3.002803000 | -0.462041000 | -1.855462000 |   |              |              |              |
| 6 | -2.482910000 | -1.821796000 | -1.785216000 |   |              |              |              |
| 6 | -1.326899000 | -2.169122000 | -2.494703000 |   |              |              |              |
| 6 | -2.345333000 | 0.498384000  | -2.631914000 |   |              |              |              |
| 6 | -2.663028000 | 2.188898000  | -0.857229000 |   |              |              |              |
| 6 | -3.348564000 | 1.191159000  | -0.049210000 |   |              |              |              |
| 6 | -3.509576000 | -0.106935000 | -0.535496000 |   |              |              |              |
| 6 | -2.176176000 | 1.854733000  | -2.124396000 |   |              |              |              |

**[10]SCPP $\supset$ C<sub>60</sub>**

Gas-phase. B3LYP-D3(BJ)/def2-SVP

| Atom | X            | Y            | Z            |
|------|--------------|--------------|--------------|
| 6    | 5.642581000  | 3.680330000  | 1.102075000  |
| 6    | 6.607641000  | 1.357603000  | 1.097349000  |
| 6    | 5.266429000  | -4.225090000 | 1.108235000  |
| 6    | 3.334811000  | -5.840108000 | 1.107223000  |
| 6    | -2.401353000 | -6.287504000 | 1.086573000  |
| 6    | -4.539351000 | -4.973704000 | 1.086366000  |
| 6    | -6.712929000 | 0.333493000  | 1.091094000  |
| 6    | -6.133271000 | 2.771899000  | 1.089190000  |
| 6    | -1.758637000 | 6.463167000  | 1.090158000  |
| 6    | 0.740430000  | 6.672139000  | 1.096503000  |
| 6    | 2.909896000  | 6.109595000  | 0.235394000  |
| 6    | 4.153422000  | 5.351703000  | 0.235450000  |
| 6    | 4.539152000  | 4.973821000  | -1.082534000 |
| 6    | 5.953733000  | 3.239488000  | -0.214575000 |
| 6    | 6.507332000  | 1.893261000  | -0.217355000 |
| 6    | 6.712697000  | -0.333637000 | -1.087764000 |
| 6    | 6.731919000  | -0.877102000 | 0.228549000  |
| 6    | 6.394692000  | -2.294864000 | 0.230387000  |
| 6    | 6.133168000  | -2.772114000 | -1.085856000 |
| 6    | 4.920207000  | -4.642671000 | -0.208021000 |
| 6    | 3.804898000  | -5.573916000 | -0.209278000 |
| 6    | 1.758395000  | -6.463617000 | -1.086226000 |



|   |              |              |              |
|---|--------------|--------------|--------------|
| 6 | 1.244507000  | -6.636200000 | 0.231186000  |
| 6 | -0.207840000 | -6.751091000 | 0.226573000  |
| 6 | -0.740694000 | -6.672718000 | -1.092420000 |
| 6 | -2.910137000 | -6.109791000 | -0.231392000 |
| 6 | -4.153531000 | -5.351681000 | -0.231567000 |
| 6 | -5.642851000 | -3.680583000 | -1.098437000 |
| 6 | -5.954102000 | -3.239645000 | 0.218145000  |
| 6 | -6.507775000 | -1.893464000 | 0.220788000  |
| 6 | -6.607977000 | -1.357863000 | -1.093944000 |
| 6 | -6.731998000 | 0.876903000  | -0.225244000 |
| 6 | -6.394585000 | 2.294610000  | -0.227084000 |
| 6 | -5.266495000 | 4.225036000  | -1.104808000 |
| 6 | -4.920436000 | 4.642588000  | 0.211491000  |
| 6 | -3.805062000 | 5.573712000  | 0.212885000  |
| 6 | -3.335137000 | 5.840513000  | -1.103535000 |
| 6 | -2.076861000 | 6.393684000  | -1.330327000 |
| 1 | -1.691386000 | 6.501214000  | -2.346015000 |
| 6 | -3.032617000 | 5.955156000  | 1.318290000  |
| 1 | -3.359535000 | 5.711066000  | 2.330944000  |
| 6 | 1.070913000  | 6.622603000  | -1.319060000 |
| 1 | 0.678817000  | 6.639813000  | -2.337554000 |
| 6 | 2.078855000  | 6.375155000  | 1.333118000  |
| 1 | 2.432039000  | 6.195577000  | 2.350494000  |
| 6 | -6.026253000 | 3.079440000  | -1.330686000 |
| 1 | -6.199004000 | 2.717648000  | -2.346215000 |
| 6 | -5.428339000 | 3.949115000  | 1.316818000  |
| 1 | -5.142829000 | 4.241142000  | 2.329203000  |
| 6 | -6.633600000 | -1.035849000 | 1.322485000  |
| 1 | -6.521984000 | -1.418501000 | 2.338377000  |
| 6 | -6.752716000 | 0.007685000  | -1.324673000 |
| 1 | -6.725899000 | 0.402128000  | -2.342129000 |
| 6 | -5.452280000 | -3.949033000 | 1.318829000  |
| 1 | -5.658285000 | -3.609186000 | 2.335305000  |
| 6 | -4.777314000 | -4.746408000 | -1.331513000 |
| 1 | -4.476930000 | -5.004750000 | -2.348702000 |
| 6 | -2.079105000 | -6.375675000 | -1.329056000 |
| 1 | -2.432281000 | -6.196266000 | -2.346466000 |
| 6 | -1.071066000 | -6.622282000 | 1.323112000  |
| 1 | -0.679060000 | -6.639390000 | 2.341646000  |
| 6 | 2.076597000  | -6.393266000 | 1.334218000  |
| 1 | 1.691104000  | -6.500311000 | 2.349951000  |
| 6 | 3.032356000  | -5.955605000 | -1.314538000 |
| 1 | 3.359252000  | -5.711826000 | -2.327276000 |
| 6 | 5.428048000  | -3.949250000 | -1.313407000 |
| 1 | 5.142218000  | -4.241150000 | -2.325738000 |
| 6 | 6.026409000  | -3.079637000 | 1.334034000  |
| 1 | 6.199403000  | -2.717899000 | 2.349540000  |
| 6 | 6.752549000  | -0.007939000 | 1.328016000  |
| 1 | 6.725893000  | -0.402421000 | 2.345461000  |
| 6 | 6.633207000  | 1.035717000  | -1.319111000 |
| 1 | 6.521380000  | 1.418394000  | -2.334966000 |
| 6 | 5.451983000  | 3.949091000  | -1.315158000 |
| 6 | -1.244727000 | 6.636105000  | -0.227210000 |
| 6 | 0.207645000  | 6.750958000  | -0.222495000 |
| 6 | 2.401182000  | 6.287711000  | -1.082536000 |
| 1 | 5.657878000  | 3.609316000  | -2.331677000 |

|    |              |              |              |
|----|--------------|--------------|--------------|
| 6  | 4.777168000  | 4.746216000  | 1.335307000  |
| 1  | 4.477011000  | 5.004628000  | 2.352547000  |
| 16 | -4.367422000 | 5.112329000  | -2.344831000 |
| 16 | -6.493136000 | 1.571401000  | 2.331962000  |
| 16 | -6.198304000 | -2.546717000 | -2.337083000 |
| 16 | -3.522253000 | -5.717085000 | 2.327098000  |
| 16 | 0.520525000  | -6.664694000 | -2.330671000 |
| 16 | 4.367291000  | -5.112094000 | 2.348387000  |
| 16 | 6.493027000  | -1.571599000 | -2.328645000 |
| 16 | 6.198182000  | 2.546391000  | 2.340585000  |
| 16 | 3.522101000  | 5.717471000  | -2.323142000 |
| 16 | -0.520806000 | 6.663633000  | 2.334706000  |
| 6  | 0.153501000  | -3.209181000 | 1.528650000  |
| 6  | -1.281584000 | -3.034445000 | 1.340333000  |
| 6  | 0.836803000  | -2.425702000 | 2.463682000  |
| 6  | -1.979065000 | -2.088012000 | 2.096328000  |
| 6  | -2.994816000 | -1.254489000 | 1.464922000  |
| 6  | -1.570102000 | -3.187400000 | -0.078795000 |
| 6  | -2.542859000 | -2.389006000 | -0.685545000 |
| 6  | -3.267075000 | -1.401487000 | 0.101159000  |
| 6  | 2.714163000  | -2.120386000 | 0.884209000  |
| 6  | 2.003979000  | -2.937063000 | -0.089993000 |
| 6  | 2.145339000  | -1.872257000 | 2.137071000  |
| 6  | 0.750226000  | -3.466106000 | 0.223819000  |
| 6  | -0.315248000 | -3.454485000 | -0.767609000 |
| 6  | 2.247694000  | -2.374514000 | -1.412868000 |
| 6  | 1.223861000  | -2.365064000 | -2.365441000 |
| 6  | -0.083686000 | -2.919690000 | -2.037898000 |
| 6  | 2.880746000  | 0.488758000  | 2.033015000  |
| 6  | 3.473251000  | 0.226420000  | 0.727436000  |
| 6  | 2.228406000  | -0.539311000 | 2.721868000  |
| 6  | 3.394015000  | -1.051031000 | 0.165512000  |
| 6  | 3.106874000  | -1.207246000 | -1.254084000 |
| 6  | 3.267419000  | 1.401725000  | -0.106660000 |
| 6  | 2.995089000  | 1.254663000  | -1.470411000 |
| 6  | 2.910576000  | -0.077920000 | -2.055077000 |
| 6  | 0.417879000  | 1.014699000  | 3.381027000  |
| 6  | 1.098834000  | 2.086027000  | 2.664306000  |
| 6  | 0.970767000  | -0.270143000 | 3.408374000  |
| 6  | 2.304865000  | 1.827736000  | 2.003688000  |
| 6  | 2.543305000  | 2.389351000  | 0.680090000  |
| 6  | 0.084010000  | 2.919928000  | 2.032415000  |
| 6  | 0.315584000  | 3.454622000  | 0.762090000  |
| 6  | 1.570460000  | 3.187636000  | 0.073287000  |
| 6  | -1.265993000 | -1.269831000 | 3.068782000  |
| 6  | -1.842300000 | 0.068045000  | 3.041667000  |
| 6  | 0.111500000  | -1.435705000 | 3.249309000  |
| 6  | -1.016768000 | 1.187589000  | 3.193855000  |
| 6  | -1.223559000 | 2.365294000  | 2.359955000  |
| 6  | -2.910397000 | 0.078115000  | 2.049623000  |
| 6  | -3.106674000 | 1.207473000  | 1.248617000  |
| 6  | -2.247408000 | 2.374671000  | 1.407417000  |
| 6  | -0.153176000 | 3.209414000  | -1.534160000 |
| 6  | -0.749904000 | 3.466297000  | -0.229322000 |
| 6  | -2.003605000 | 2.937158000  | 0.084526000  |
| 6  | -0.836439000 | 2.425912000  | -2.469229000 |

|   |              |              |              |
|---|--------------|--------------|--------------|
| 6 | 1.266313000  | 1.270061000  | -3.074345000 |
| 6 | 1.979328000  | 2.088189000  | -2.101831000 |
| 6 | 1.281916000  | 3.034660000  | -1.345835000 |
| 6 | -0.111172000 | 1.435919000  | -3.254910000 |
| 6 | -0.417556000 | -1.014522000 | -3.386614000 |
| 6 | 1.017091000  | -1.187402000 | -3.199391000 |
| 6 | 1.842574000  | -0.067835000 | -3.047181000 |
| 6 | -0.970426000 | 0.270330000  | -3.413968000 |
| 6 | -2.880400000 | -0.488548000 | -2.038549000 |
| 6 | -2.304506000 | -1.827494000 | -2.009186000 |
| 6 | -1.098518000 | -2.085848000 | -2.669887000 |
| 6 | -2.228036000 | 0.539501000  | -2.727388000 |
| 6 | -2.713661000 | 2.120419000  | -0.889677000 |
| 6 | -3.393701000 | 1.051195000  | -0.171036000 |
| 6 | -3.473043000 | -0.226239000 | -0.733015000 |
| 6 | -2.144878000 | 1.872382000  | -2.142544000 |

## References:

- 1 A. D. Becke, *Phys. Rev. A* 1988, **38**, 3098-3100.
- 2 C. Lee, W. Yang and R. G. Parr, *Phys. Rev. B* 1988, **37**, 785-789.
- 3 S.H. Vosko, L. Wilk, M. Nusair, *Can. J. Phys.* 1980, **58**, 1200-1211.
- 4 F. Weigend and R. Ahlrichs, *Phys. Chem. Chem. Phys.* 2005, **7**, 3297-3305.
- 5 F. Weigend, *Phys. Chem. Chem. Phys.* 2006, **8**, 1057-1065.
- 6 S. Grimme, J. Antony, S. Ehrlich and H. Krieg, *J. Chem. Phys.* 2010, **132**, 154104.
- 7 S. Grimme, S. Ehrlich and L. Goerigk, *J. Comput. Chem.* 2011, **32**, 1456-1465.
- 8 S. Hirata and M. Head-Gordon, *Chem. Phys. Lett.* 1999, **314**, 291-299.
- 9 T. Yanai, D. P. Tew and N. C. Handy, *Chem. Phys. Lett.* 2004, **393**, 51-57.
- 10 Gaussian 16, Revision A.03, M. J. Frisch, G. W. Trucks, H. B. Schlegel, G. E. Scuseria, M. A. Robb, J. R. Cheeseman, G. Scalmani, V. Barone, G. A. Petersson, H. Nakatsuji, X. Li, M. Caricato, A. V. Marenich, J. Bloino, B. G. Janesko, R. Gomperts, B. Mennucci, H. P. Hratchian, J. V. Ortiz, A. F. Izmaylov, J. L. Sonnenberg, D. Williams-Young, F. Ding, F. Lipparini, F. Egidi, J. Goings, B. Peng, A. Petrone, T. Henderson, D. Ranasinghe, V. G. Zakrzewski, J. Gao, N. Rega, G. Zheng, W. Liang, M. Hada, M. Ehara, K. Toyota, R. Fukuda, J. Hasegawa, M. Ishida, T. Nakajima, Y. Honda, O. Kitao, H. Nakai, T. Vreven, K. Throssell, J. A. Montgomery, Jr., J. E. Peralta, F. Ogliaro, M. J. Bearpark, J. J. Heyd, E. N. Brothers, K. N. Kudin, V. N. Staroverov, T. A. Keith, R. Kobayashi, J. Normand, K. Raghavachari, A. P. Rendell, J. C. Burant, S. S. Iyengar, J. Tomasi, M. Cossi, J. M. Millam, M. Klene, C. Adamo, R. Cammi, J. W. Ochterski, R. L. Martin, K. Morokuma, O. Farkas, J. B. Foresman, and D. J. Fox, Gaussian, Inc., Wallingford CT, 2016.
- 11 R. S. Mulliken, *J. Chem. Phys.* 1955, **23**, 1833-1840.
- 12 R. S. Mulliken, *J. Chem. Phys.* 1955, **23**, 1841-1846.
- 13 P. O. Löwdin, *J. Chem. Phys.* 1950, **18**, 365-375.
- 14 F. L. Hirshfeld, *Theor. Chim. Acta* 1977, **44**, 129-138.
- 15 A. V. Marenich, S. V. Jerome, C. J. Cramer, D.G. Truhlar, *J. Chem. Theory Comput.* 2012, **8**, 527-541.
- 16 A. E. Reed, R. B. Weinstock, and F. Weinhold, *J. Chem. Phys.* 1985, **83**, 735-746.
- 17 U. C. Singh, P. A. Kollman, *J. Comput. Chem.*, 1984, **5**, 129-145.
- 18 K. Eichkorn, F. Weigend, O. Treutler, R. Ahlrichs; *Theor. Chem. Acc.* 1997, **97**, 119.
- 19 K. Morokuma, *J. Chem. Phys.* 1971, **55**, 1236-1244.
- 20 F. M. Bickelhaupt, E. J. Baerends, in *Reviews in Computational Chemistry*, vol. 15 (Eds.: K.B. Lipkowitz, D.B. Boyd), John Wiley & Sons, Inc., 2000, pp. 1-86.
- 21 ADF 2018, SCM, Theoretical Chemistry, Vrije Universiteit, Amsterdam, The Netherlands, E.J. Baerends, T. Ziegler, A.J. Atkins, J. Autschbach, O. Baseggio, D. Bashford, A. Bérces, F.M. Bickelhaupt, C. Bo, P.M. Boerrigter, L. Cavallo, C. Daul, D.P. Chong, D.V. Chulhai, L. Deng, R.M. Dickson, J.M. Dieterich, D.E. Ellis, M. van Faassen, L. Fan, T.H. Fischer, A. Förster, C. Fonseca Guerra, M. Franchini, A. Ghysels, A. Giammona, S.J.A. van Gisbergen, A. Goetz, A.W. Götz, J.A. Groeneveld, O.V. Gritsenko, M. Grüning, S. Gusarov, F.E. Harris, P. van den Hoek, Z. Hu, C.R. Jacob, H. Jacobsen, L. Jensen, L. Joubert, J.W. Kaminski, G. van Kessel, C. König, F. Kootstra, A. Kovalenko, M.V. Krykunov, E. van Lenthe, D.A. McCormack, A. Michalak, M. Mitoraj, S.M. Morton, J. Neugebauer, V.P. Nicu, L. Noodleman, V.P. Osinga, S. Patchkovskii, M. Pavanello, C.A. Peebles, P.H.T. Philipsen, D. Post, C.C.

- Pye, H. Ramanantoanina, P. Ramos, W. Ravenek, J.I. Rodríguez, P. Ros, R. Rüger, P.R.T. Schipper, D. Schlüns, H. van Schoot, G. Schreckenbach, J.S. Seldenthuis, M. Seth, J.G. Snijders, M. Solà, M. Stener, M. Swart, D. Swerhone, V. Tognetti, G. te Velde, P. Vernooijs, L. Versluis, L. Visscher, O. Visser, F. Wang, T.A. Wesolowski, E.M. van Wezenbeek, G. Wiesenekker, S.K. Wolff, T.K. Woo, A.L. Yakovlev
- 22 G. A. Zhurko, Chemcraft 1.80 (build 523b) - graphical program for visualization of quantum chemistry computations. (<https://chemcraftprog.com>).
  - 23 A. Dreuw, M. Head-Gordon, Chem. Rev. 2005, **105**, 4009-4037.
  - 24 A. Chantzis, A.D. Laurent, A.D., C. Adamo, D. Jacquemin, J. Chem. Theory Comput. 2013, **9**, 4517-4525.
  - 25 M. Isegawa, D.G. Truhlar, J. Chem. Phys. 2013, **138**, 134111.
  - 26 C. Hu, O. Sugino, K. Watanabe, J. Chem. Phys. 2014, **140**, 054106.
  - 27 T. Ziegler and A. Rauk, Theor. Chim. Acta 1977, **46**, 1-10.
  - 28 T. Ziegler and A. Rauk, Inorg. Chem. 1979, **18**, 1558-1565.
  - 29 T. Ziegler and A. Rauk, Inorg. Chem. 1979, **18**, 1755-1759.
  - 30 S. Grimme, J. Comput. Chem. 2004, **25**, 1463-1473.
  - 31 S. Grimme, J. Comput. Chem. 2006, **27**, 1787-1799.
  - 32 F. Plasser and H. Lischka, J. Chem. Theory Comput. 2012, **8**, 2777-2789.
  - 33 F. Plasser, S. A. Böppler, M. Wormit and A. Dreuw, J. Chem. Phys. 2014, **141**, 024107.
  - 34 A. V. Luzanov and O.A. Zhikol, Int. J. Quantum Chem. 2010, **110**, 902-924.
  - 35 A. Klamt, G. Schüürmann, J. Chem. Soc. Perkin Trans. 1993, **2**, 799-805.
  - 36 J. Tomasi, B. Mennucci and R. Cammi, Chem. Rev. 2005, **105**, 2999-3093.
  - 37 A.A. Voityuk and S.F. Vyboishchikov, Phys. Chem. Chem. Phys. 2019, **21**, 18706-18713.
  - 38 S.F. Vyboishchikov and A.A. Voityuk, Phys. Chem. Chem. Phys. 2020, **22**, 14591-14598.
  - 39 A. Klamt, G. Schüürmann, J. Chem. Soc. Perkin Trans. 1993, **2**, 799-805.
  - 40 J. L. Pascual-Ahuir, E. Silla, and I. Tuñón, J. Comp. Chem. 1994, **15**, 1127-1138.
  - 41 A. Klamt, J. Phys. Chem. 1996, **100**, 3349-3353.
  - 42 R. A. Marcus and N. Sutin, Biochim. Biophys. Acta, Rev. Bioenerg. 1985, **811**, 265-322.
  - 43 A. A. Voityuk and N. Rösch, J. Chem. Phys. 2002, **117**, 5607-5616.
  - 44 A. A. Voityuk, Phys. Chem. Chem. Phys. 2012, **14**, 13789-13793.
  - 45 J. Ulstrup, J. Jortner, J. Chem. Phys. 1975, **63**, 4358-4368.
  - 46 J. Jortner, J. Chem. Phys. 1976, **64**, 4860-4867.
  - 47 T. Liu, A. Troisi, J. Phys. Chem. C, 2011, **115**, 2406-2415.
  - 48 A. J. Stasyuk, O. A. Stasyuk, M. Solà, A. A. Voityuk, Chem. Commun., 2020, **56**, 12624-12627.
  - 49 O. A. Stasyuk, A. J. Stasyuk, M. Solà, A. A. Voityuk, Chem. Eur. J., 2021, **27**, 8737-8744.
  - 50 R. F. W. Bader, Chem. Rev. 1991, **91**, 893-928.
  - 51 R. F. W. Bader, Atoms in Molecules: A Quantum Theory; International Series of Monographs on Chemistry 22; Oxford University Press: Oxford, U.K., **1990**.
  - 52 C. F. Matta, N. Castillo and R. J. Boyd, J. Phys. Chem. B 2006, **110**, 563-578.
  - 53 C. R. Wick and T. Clark, J. Mol. Model. 2018, **24**, 142.
  - 54 P. S. V. Kumar, V. Raghavendra and V Subramanian, J. Chem. Sci. 2016, **128**, 1527-1536.
  - 55 Keith, T. A. AIMAll, version 14.06.21; TK Gristmill Software: Overland Park, KS, **2014**.

- 56 E. Johnson, S. Keinan, P. Mori-Sánchez, J. Contreras-García, A. Cohen and W. Yang, *J. Am. Chem. Soc.* 2010, **132**, 6498–6506.
- 57 J. Contreras-García, E. Johnson, S. Keinan, R. Chaudret, J. Piquemal, D. Beratan and W. Yang, *J. Chem. Theory Comput.* 2011, **7**, 625–632.
- 58 J. Contreras-García, W. Yang and E. Johnson, *J. Phys. Chem. A*, 2011, **115**, 12983–12990.
- 59 T. Lu and F. Chen, *J. Comput. Chem.* 2012, **33**, 580-592.
